# Supplementary material for: Laboratory experimental investigation of heat transport in fractured media
Source: Copernicus journal article supplement (doi:10.5194/npg-24-23-2017), 2017-01-26
Supplement: Supplementary file 1 [file Manuscript_npg-2016-231216.docx]

**LABORATORY EXPERIMENTAL INVESTIGATION OF HEAT TRANSPORT IN FRACTURED MEDIA**

Claudia Cherubini (1) (2), Nicola Pastore (3), Concetta I. Giasi (3), Nicoletta Maria Allegretti (3)

(1) Department of Mechanical, Aerospace & Civil Engineering - Brunel University London, Uxbridge, UB8 3PH, United Kingdom (2) School of Civil Engineering, The University of Queensland, Queensland, Australia (3) DICATECh - Department of Civil, Environmental, Building Engineering, and Chemistry – Politecnico di Bari, Italy

The authors declares that there is no conflict of interest regarding the publication of this paper.

**Abstract**

Low enthalpy geothermal energy is a renewable resource that is still underexploited nowadays, in relation to its potential for development in the society worldwide. Most of its applications have already been investigated, such as: heating and cooling of private and public buildings, roads defrost, cooling of industrial processes, food drying systems or desalination.

Geothermal power development is a long, risky and expensive process. It basically consists of successive development stages aimed at locating the resources (exploration), confirming the power generating capacity of the reservoir (confirmation) and building the power plant and associated structures (site development). Different factors intervene in influencing the length, difficulty and materials required for these phases thereby affecting their cost.

One of the major limitations related to the installation of low enthalpy geothermal power plants regards the initial development steps which are risky and the upfront capital costs that are huge.

Most of the total cost of geothermal power is related to the reimbursement of invested capital and associated returns.

In order to increase the optimal efficiency of installations which use groundwater as geothermal resource, flow and heat transport dynamics in aquifers need to be well characterized. Especially in fractured rock aquifers these processes represent critical elements that are not well known. Therefore there is a tendency to oversize geothermal plants.

In literature there are very few studies on heat transport especially in fractured media.

This study is aimed to deepen the understanding of this topic through heat transport experiments in fractured network and their interpretation.

Heat transfer tests have been carried out on the experimental apparatus previously employed to perform flow and tracer transport experiments, which has been modified in order to analyze heat transport dynamics in a network of fractures. In order to model the obtained thermal breakthrough curves, the Explicit Network Model (ENM) has been used, which is based on an adaptation of a Tang’s solution for the transport of the solutes in a semi-infinite single fracture embedded in a porous matrix.

Parameter estimation, time moment analysis, tailing character and other dimensionless parameters have permitted to better understand the dynamics of heat transport and the efficiency of heat exchange between the fractures and matrix. The results have been compared with the previous experimental studies on solute transport.

**1 Introduction**

An important role in transport of natural resources or contaminant transport through subsurface systems is given by fractured rocks. The interest about the study of dynamics of heat transport in fractured media has grown in recent years because of the development of a wide range of applications, including geothermal energy harvesting (Gisladottir et al., 2016).

Quantitative geothermal reservoir characterization using tracers is based on different approaches for predicting thermal breakthrough curves in fractured reservoirs (Shook, 2001, Kocabas, 2005, Read et al., 2013).

The characterization and modeling of heat transfer in fractured media is particularly challenging as open and well-connected fractures can induce highly localized pathways which are orders of magnitude more permeable than the rock matrix (Klepikova et al., 2016, Cherubini and Pastore, 2011).

The study of solute transport in fractured media has become recently a widely diffused research topic in hydrogeology (Cherubini, 2008, Cherubini et al., 2008, Cherubini et al., 2009, Cherubini et al., 2013d, Masciopinto et al., 2010), whereas the literature about heat transfer in fractured media is somewhat limited.

Hao et al. (2013) developed a dual continuum model for the representation of discrete fractures and the interaction with surrounding rock matrix in order to give a reliable prediction of the impacts of fracture – matrix interaction on heat transfer in fractured geothermal formations.

Moonen et al. (2011) introduced the concept of cohesive zone which represents a transition zone between the fracture and undamaged material. They proposed a model to adequately represent the influences of fractures or partially damaged material interfaces on heat transfer phenomena.

Geiger and Emmanuel (2010) found that matrix permeability plays an important role on thermal retardations and attenuation of thermal signal. At high matrix permeability, poorly connected fractures can contribute to the heat transport, resulting in heterogeneous heat distributions in the whole matrix block. For lower matrix permeability heat transport occurs mainly through fractures that form a fully connected pathway between the inflow and outflow boundaries, that results in highly non – Fourier behavior, characterized by early breakthrough and long tailing.

Numerous field observations (Tsang and Neretnieks, 1998) show that flow in fractures is being organized in channels due to the small scale variations in the fracture aperture. Flow channeling causes dispersion in fractures. Such channels will have a strong influence on the transport characteristics of a fracture, such as, for instance, its thermal exchange area, crucial for geothermal applications (Auradou et al., 2006). Highly channelized flow in fractured geologic systems has been credited with early thermal breakthrough and poor performance of geothermal circulation systems (Hawkins et al., 2012).

Lu et. al (2012) conducted experiments of saturated water flow and heat transfer in a regularly fractured granite at meter scale. The experiments indicated that the heat advection due to water flow in vertical fractures nearest to the heat sources played a major role in influencing the spatial distributions and temporal variations of the temperature, impeding heat conduction in transverse direction; such effect increased with larger water fluxes in the fractures and decreased with higher heat source and/or larger distance of the fracture from the heat source.

Neuville et al. (2010) showed that fracture – matrix thermal exchange is highly affected by the fracture wall roughness. Natarajan et. al (2010) conducted numerical simulation of thermal transport in a sinusoidal fracture matrix coupled system. They affirmed that this model presents a different behavior respect to the classical parallel plate fracture matrix coupled system. The sinusoidal curvature of the fracture provides high thermal diffusion into the rock matrix.

Ouyang (2014) developed a three – equation local thermal non – equilibrium model to predict the effective solid – to – fluid heat transfer coefficient in geothermal system reservoirs. They affirmed that due to the high rock – to – fracture size ratio, the solid thermal resistance effect in the internal rocks cannot be neglected in the effective solid – to fluid heat transfer coefficient. Furthermore the results of this study show that it is not efficient to extract the thermal energy from the rocks if fracture density is not large enough.

Analytical and semi-analytical approaches have been developed to describe the dynamics of heat transfer in fractured rocks. Such approaches are amenable to the same mathematical treatment as their counterparts developed for mass transport (Martinez et al., 2014). One of these is the analytical solution derived by Tang et al. (1981).

While the equations of solute and thermal transport have the same basic form, the fundamental difference between mass and heat transport is that: 1) solutes are transported through the fractures only, whereas heat is transported through both fractures and matrix, 2) the fracture-matrix exchange is large compared with molecular diffusion. This means that the fracture matrix exchange is more relevant for heat transport than for mass transport. Thus, matrix thermal diffusivity strongly influences the thermal breakthrough curves (BTCs) (Becker and Shapiro, 2003).

Contrarily, since the heat capacity of the solids will retard the advance of the thermal front, the advective transport for heat is slower than for solute transport (Rau et al., 2012).

The quantification of thermal dispersivity as far as heat transport and its relationship with velocity hasn’t been properly addressed experimentally and has got conflicting descriptions in literature (Ma et al., 2012).

Most studies neglect the hydrodynamic component of thermal dispersion because of thermal diffusion being more efficient than molecular diffusion by several orders of magnitude (Bear 1972). Analysis of heat transport under natural gradients has commonly neglected hydrodynamic dispersion (e.g., Bredehoeft and Papadopulos, 1965; Domenico and Palciauskas, 1973; Taniguchi et al., 1999; Reiter, 2001; Ferguson et al., 2006). Dispersive heat transport is often assumed to be represented by thermal conductivity and/or to have little influence in models of relatively large systems and modest fluid flow rates (Bear, 1972, Woodbury and Smith, 1985).

Some authors suggest that thermal dispersivity enhances the spreading of thermal energy and should therefore be part of the mathematical description of heat transfer in analogy to solute dispersivity (de Marsily, 1986) and have incorporated this term into their models (e.g., Smith and Chapman, 1983; Hopmans et al., 2002; Niswonger and Prudic, 2003). In the same way, other researchers (e.g., Smith and Chapman, 1983, Ronan et al., 1998, Constanz et al., 2002, Su et al., 2004) have included the thermomechanical dispersion tensor representing mechanical mixing caused by unspecified heterogeneities within the porous medium.

On the contrary, some other researchers argue that the enhanced thermal spreading is either negligible or can be described simply by increasing the effective diffusivity, thus the hydrodynamic dispersivity mechanism is inappropriate (Bear, 1972; Bravo et al., 2002, Ingebritsen and Sanford, 1998, Keery et al, 2007). Constantz et al. (2003) and Vandenbohede et al. (2009) found that thermal dispersivity was significantly smaller than the solute dispersivity. Others (de Marsily, 1986, Molina-Giraldo et al., 2011) found that thermal and solute dispersivity were on the same order of magnitude.

Tracer tests of both solute and heat were carried out at Bonnaud, Jura, France (deMarsily, 1986) and the thermal dispersivity and solute dispersivity were found of the same order of magnitude.

Bear (1972), Ingebritsen and Sanford (1998), and Hopmans et al. (2002), among others, concluded that the effects of thermal dispersion are negligible compared to conduction and set the former to zero.

However, Hopmans et al (2002) showed that dispersivity is increasingly important at higher flow water velocities, since it is only then that the thermal dispersion term is of the same order of magnitude or larger than the conductive term.

Sauty et al. (1982) suggested that there was a correlation between the apparent thermal conductivity and Darcy velocity thus they included the hydrodynamic dispersion term in the advective-conductive modeling.

Other similar formulations of this concept are present in the literature (e.g., Papadopulos and Larson, 1978; Smith and Chapman, 1983; Molson et al., 1992). Such treatments have not explicitly distinguished between macrodispersion, which occurs due to variations in permeability over larger scales and the components of hydrodynamic dispersion that occur due to variations in velocity at the pore scale.

One group of authors have utilized a linear relationship to describe the thermal dispersivity and the relationship between thermal dispersivity and fluid velocity (e.g., de Marsily, 1986; Anderson, 2005; Hatch et al., 2006; Keery et al., 2007; Vandenbohede et al., 2009; Vandenbohede and Lebbe, 2010; Rau et al., 2010), while others have identified the possibility of a nonlinear relationship (Green et al., 1964).

The present study is aimed at providing a better understanding of heat transfer mechanisms in fractured rocks. Laboratory experiments on mass and heat transport in a fractured rock sample have been carried out in order to analyze the contribution of thermal dispersion in heat propagation processes, the influence of nonlinear flow dynamics on the enhancement of thermal matrix diffusion and finally the optimal conditions for thermal exchange in a fractured network.

Section 1 shows a short review about mass and heat transport in fractured media highlighting what is still unresolved or contrasting in the literature.

In Section 2 the theoretical background related to non linear flow, solute and heat transport behavior in fractured media has been reported.

A better development of the Explicit Network Model (ENM), based on a Tang’s solution developed for solute transport in a single semi-infinite fracture inside a porous matrix has been used for the fitting of the thermal BTCs. The ENM model explicitly takes the fracture network geometry into account and therefore permits to understand the physical meaning of mass and heat transfer phenomena and to obtain a more accurate estimation of the related parameters. In analogous way the ENM model has been used in order to fit the observed BTCs obtained from previous experiments on mass transport.

Section 3 shows the thermal tracer tests carried out on an artificially created fractured rock sample that has been used in previous studies to analyze nonlinear flow and non Fickian transport dynamics in fractured formations (Cherubini et al., 2012, 2013a, 2013b, 2013c and 2014).

In Section 4 have been reported the interpretation of flow and transport experiments together with the fitting of BTCs and interpretation of estimated model parameters. In particular, the obtained thermal BTCs show a more enhanced early arrival and long tailing than solute BTCs.

The travel time for solute transport is an order of magnitude lower than for heat transport experiments. Thermal convective velocity is thus more delayed respect to solute transport. The thermal dispersion mechanism dominates heat propagation in the fractured medium in the carried out experiments and thus cannot be neglected.

For mass transport the presence of the secondary path and the nonlinear flow regime are the main factors affecting non – Fickian behavior observed in experimental BTCs, whereas for heat transport the non - Fickian nature of the experimental BTCs is governed mainly by the heat exchange mechanism between the fracture network and the surrounding matrix. The presence of a nonlinear flow regime gives rise to a weak growth on heat transfer phenomena.

Section 5 reports some practical applications of the knowledges acquired from this study on the convective heat transport in fractured media for exploiting heat recovery and heat dissipation. Furthermore the estimation of the average effective thermal conductivity suggests that there is a solid thermal resistance in the fluid to solid heat transfer processes due to the rock – fracture size ratio. This result matches previous analyses (Pastore et al., 2015) in which a lower heat dissipation respect to the Tang’s solution in correspondence of the single fracture surrounded by a matrix with more limited heat capacity has been found.

**2 Theoretical background**

**2.1 Nonlinear flow**

With few exceptions, any fracture can be envisioned as two rough surfaces in contact. In cross section the solid areas representing asperities might be considered as the grains of porous media.

Therefore, in most studies examining hydrodynamic processes in fractured media, the general equations describing flow and transport in porous media are applied, such as Darcy’s law, that depicts a linear relationship between the pressure gradient and fluid velocity (Whitaker, 1986; Cherubini and Pastore, 2010)

However, this linearity has been demonstrated to be valid at low flow regimes (Re < 1). For Re > 1 a nonlinear flow behavior is likely to occur (Cherubini, 2013d).

When *Re* >> 1, a strong inertial regime develops, that can be described by the Forchheimer equation (Forchheimer, 1901):

(1)

Where *x* (m) is the coordinate parallel to the axis of the single fracture (*SF*), *p* (ML-1T-2) is the flow pressure, *μ* (ML-1T-1) is the dynamic viscosity, *k* (L2) is the permeability, *uf* (LT-1) is the convective velocity, ρ (ML-3) is the density and *β* (L-1) is called the inertial resistance coefficient, or non – Darcy coefficient.

It is possible to express Forchheimer law in terms of hydraulic head *h* (L):

(2)

The coefficients *a’* (TL-1) and *b’* (TL-2) represent the linear and inertial coefficient respectively equal to:

(3)

The relationship between hydraulic head gradient and flow rate *Q* (L3T-1) can be written as:

(4)

The coefficients *a* (TL-3) and *b* (T2L-6) can be related to *a’* and *b’*:

(5)

Where *ωeq* (L2) is the equivalent cross sectional area of *SF*.

**2.2 Heat transfer by water flow in single fractures**

Fluid flow and heat transfer in a single fracture (*SF*) undergo advective, diffusive and dispersive phenomena. Dispersion is caused by small scale fracture aperture variations. Flow channeling is one example of macrodispersion caused by preferred flow paths, in that mass and heat tend to migrate through the portions of a fracture with the largest apertures.

In fractured media another process is represented by diffusion into surrounding rock matrix. Matrix diffusion attenuates the mass and heat propagation in the fractures.

According to the boundary – layer theory (Fahien, 1983), solute mass transfer *qm* (ML-2) per unit area at the fracture-matrix interface (Wu et al., 2010) is given by:

(6)

Where *cf* (ML-3) is the concentration across fractures, *cm* (ML-3) is the concentration of the matrix block surfaces, *Dm* (LT-2) is the molecular diffusion coefficient, and *δ* (m) is the thickness of boundary layer (Wu et al., 2010). For small fractures, *δ* may become the aperture *wf* (m) of the *SF.*

In analogous manner the specific heat transfer flux *qH* (MT-3) at the fracture – matrix interface is given by:

(7)

Where *Tf* (K) is the temperature across fractures, *Tm* (K) is the temperature of the matrix block surfaces, *km* (MLT-3K-1) is the thermal conductivity.

The continuity conditions at the fracture – matrix interface requires a balance between mass transfer rate and mass diffused into the matrix described as:

(8)

Where *z* (m) is the coordinate perpendicular to the fracture axis and *wf* is the aperture of the fracture.

In the same way the specific heat flux must be balanced by heat diffused into the matrix described as:

(9)

The effective diffusion coefficient takes into account the fact that diffusion can only take place through pore and fracture openings because mineral grains block many of the possible pathways. The effective thermal conductivity of a formation consisting of multiple components depends on the geometrical configuration of the components as well as on the thermal conductivity of each.

The effective terms (*De* instead of *Dm* and *k*e instead of *k*m) have been introduced in order to include the effect of various system parameters such as fluid velocity, porosity, surface area, roughness, that may enhance mass and heat transfer effect. For instance, when large flow velocity occurs, convective transport is stronger along the centre of the fracture, enhancing the concentration or temperature gradient at the fracture matrix interface. As known roughness plays an important role in increasing mass or heat transfer because of increasing turbulent flow conditions.

According to Bodin (2007) the governing equation for the one dimensional advective - dispersive transport along the axis of a semi-infinite fracture with one – dimensional diffusion in the rock matrix, in perpendicular direction to the axis of the fracture is:

(10)

Where *Df* (L2T-1) is the dispersion. The latter mainly depends on two processes: Aris – Taylor dispersion and geometrical dispersion. Previous experiments (Cherubini et al., 2012, 2013a, 2013b, 2013c and 2014) show that, due to the complex geometrical and topological characteristics of the fracture network that create tortuous flow paths, Aris – Taylor dispersion may not develop. A linear relationship has been found between velocity and dispersion so geometrical dispersion is mostly responsible for the mixing process along the fracture:

(11)

Where *αLM* (L) is the dispersivity coefficient for mass transport.

Assuming that fluid flow velocity in the surrounding rock matrix is equal to zero, the equation for the conservation of heat in the matrix is given by:

(12)

Where *Da* is the apparent diffusion coefficient of the solute in the matrix expressed as function of the matrix porosity *θm*, (Bodin et al., 2007).

Tang et al. (1981) presented an analytical solution for solute transport in semi – infinite single fracture embedded in a porous rock matrix with a constant concentration at the fracture inlet (*x* = 0) equal to *c0* (ML-3) and with an initial concentration equal to zero. The solute concentration in the fracture and in the matrix has been given as function of time in Laplace space as follows:

(13)

(14)

Where *s* is the integral variable of the Laplace transform, *L* (L) is the length of *SF*, the *v*, *A*, *β2* and *B* coefficients are expressed as follows: (15)

(16)

(17)

(18)

Whereas the gradient of at the interface *z = wf* /*2* is:

(19)

Defined the residence time as the average amount of time that the solute spends in the system, on the basis of these analytical solutions the probability density function (*PDF*) of the solute residence time in the single fracture in the Laplace space can be expressed as:

(20)

Assuming that density and heat capacity are constant in time, the heat transport conservation equation in *SF* can be expressed as follows:

(21)

Where *ρw* (ML-3), *Cw* (L2T2K-1) represent the density, the specific heat capacity of the fluid within *SF* respectively. *Df* for heat transport assumes the following expression:

(22)

Where *λL*is the thermodynamic dispersion coefficient (MLT-3K-1). Sauty et al. (1982) and de Marsily (1986) proposed an expression for the thermal dispersion coefficient where the thermal dispersion term varies linearly with velocity and depends on the heterogeneity of the medium, as for solute transport:

(23)

Where *k0* is the bulk thermal conductivity (MLT-3K-1) and *αLH* (L) is the longitudinal thermal dispersivity.

The heat transport conservation equation in the matrix is expressed as follows:

(24)

Note that the governing equations of heat and mass transport highlight similarities between the two processes, thus Tang’s solution can be used also for heat transport.

In terms of heat transport, the coefficients *v*, *A*, *β2* and *B* are expressed as follows:

(25)

(26)

where and .

(27)

(28)

Three characteristic time scales can be defined:

(29)

Where *L* (L) is the characteristic length, *tu* (T), *td* (T) and *te* (T) represent the characteristics time scales of convective transport, dispersive transport and loss of the mass or heat into the surrounding matrix.

The relative effect of dispersion, convection and matrix diffusion on mass or heat propagation in the fracture can be evaluated by comparing the corresponding time scale.

Peclet number *Pe* is defined as the ratio between dispersive (td) to convective (tu) transport times:

(30)

At high Peclet numbers transport processes are mainly governed by convection, whereas at low Peclet numbers it is mainly dispersion that dominates.

Another useful dimensionless number, generally applied in chemical engineering, is the Damköhler number that can be used in order to evaluate the influence of matrix diffusion on convection phenomena. *Da* relates the convection time scale to the exchange time scale.

(31)

Where α (T-1) is the exchange rate coefficient corresponding to:

(32)

Note that the inverse of *te* has the same meaning of the exchange rate coefficient *α* (T-1).

When *te* values are of the same order of magnitude as the transport time *tu* (*Da*≅1), diffusive processes in the matrix are more relevant. In this case concentration or temperature distribution profiles are characterized by a long tail.

When (*Da* the fracture – matrix exchange is very slow and it does not influence mass or heat propagation. On the contrary when (*Da* the fracture matrix exchange is rapid, there is instantaneous equilibrium between fracture and matrix and they have the same concentration or temperature. These two circumstances close the standard advective – dispersive transport equation.

The product between *Pe* and *Da* represents another dimensionless group which is a measure of transport processes:

(33)

When increases *te* decreases more rapidly than *td*, and subsequently the mass or heat diffusion into the matrix may be dominant on the longitudinal dispersion.

**2.3 Explicit network model (ENM)**

The 2D Explicit Network Model (ENM) depicts the fractures as 1D pipe elements forming a 2D – pipe network and therefore expressly takes the fracture network geometry into account. The ENM model permits to understand the physical meaning of flow and transport phenomena and therefore to obtain a more accurate estimation of flow and transport parameters.

With the assumption that a *j*th *SF* can be schematized by a 1D – pipe element, the Forchheimer model can be used to write the relationship between head loss (L) and flow rate (L3T-1) in finite terms:

(34)

Where *Lj* (L) is the length of *j*th *SF*, *a* (TL-3) and *b* (T2L-6) represent the Forchheimer parameters written in finite terms. The term in the square brackets constitutes the resistance to flow (TL-2) of *j*th *SF* .

In case of steady – state conditions and for a simple 2D fracture network geometry, a straightforward manner can be applied to obtain the solution of flow field by applying the first and second Kirchhoff’s laws.

In a 2D fracture network, fractures can be arranged in series and/or in parallel. Specifically, in a network in which fractures are set in a chain, the total resistance to flow is calculated by simply adding up the resistance values of each single fracture. The flow in a parallel fracture network breaks up, with some flowing along each parallel branch and re – combining when the branches meet again. In order to estimate the total resistance to flow the reciprocals of the resistance values have to be added up and then the reciprocal of the total has to be calculated. The flow rate *Qj* across the generic fracture *j* of the parallel network can be calculated as (Cherubini et al., 2014):

(35)

Where ( LT-3) is the sum of the mass flow rates at fracture intersections in correspondence of the inlet bond of *j* fracture, whereas the term in square brackets represents the probability of water distribution of *j* fracture *PQ,j*.

Once known the flow field in the fracture network, to obtain the *PDF* at a generic node the *PDFs* of each elementary path that reaches the node have to be summed up. They can be calculated as the convolution product of the *PDFs* of each single fracture composing the elementary path.

Definitely the BTC describing the concentration in the fracture as function of time at the generic node, using the convolution theorem, can be obtained as follows:

(36)

Where *c0* (ML-3) is the initial concentration and *cinj* (ML-3) is the concentration injection function, * is the convolution operator, *L*-1 represents the inverse Laplace transform operator, *Np* is the number of the paths reaching the node, *nf,i*is the number of the *SF* belonging to the elementary path *i*th, *PM,j* and are the mass distribution probability and the *PDF* in the Laplace space of the generic *j*th *SF* respectively*.* Inverse Laplace transform *L*-1 can be solved numerically using Abate et al. (2006) algorithm.

At the same way the BTC *Tf* which describes the temperature in the fracture as function of time at the generic node can be written as:

(37)

Where *T0* (K) is the initial temperature, *Tinj* (K) is the temperature injection function and *PH,j* is the heat distribution probability.

and can be estimated as the probabilities of the mass and heat distribution at the inlet bond of each individual *SF* respectively. The mass and heat distribution is proportional to the correspondent flow rates:

(38)

Note that if Equation 38 is valid, the probability of water distribution is equal to the probabilities of mass and heat distribution (term in square brackets in Equation 34). Definitely the ENM model regarding each *SF* can be described by four parameters (*uf,j*, *Df,j*, *αj*, *PQ,j*).

**3 Material and methods**

**3.1 Description of the experimental apparatus**

The heat transfer tests have been carried out on the experimental apparatus previously employed to perform flow and tracer transport experiments at bench scale (Cherubini et al. 2012, 2013a, 2013b, 2013c and 2014). However, the apparatus has been modified in order to analyze heat transport dynamics. Two thermocouples have been placed at the inlet and the outlet of a selected fracture path of the limestone block with parallelepiped shape (0.6×0.4×0.08 m3) described in previous studies. A TC – 08 Thermocouple Data Logger (pico Technology) with a sampling rate of 1 second has been connected to the thermocouples. An extruded polystyrene panel with thermal conductivity equal to 0.034 Wm-1K-1 and thickness 0.05 m has been used to thermally insulate the limestone block which has then been connected to a hydraulic circuit. The head loss between the upstream tank connected to the inlet port and the downstream tank connected to the outlet port drives flow of water through the fractured block. An ultrasonic velocimeter (DOP3000 by Signal Processing) has been adopted to measure the instantaneous flow rate that flows across the block. An electric boiler with a volume of 10-2 m3 has been used to heat the water. In a flow cell located in correspondence of the outlet port a multiparametric probe is positioned for the instantaneous measurement of pressure (dbar), temperature (°C) and electric conductivity (μS cm−1). Figure 1a shows the fractured block sealed with epoxy resin, Figure 1b shows the thermal insulated fractured block connected to the hydraulic circuit, whereas the schematic diagram of the experimental apparatus is shown in Figure 2.

**3.2 Flow experiments.**

The average flow rate through the selected path can be evaluated as:

(39)

Where *S1* (L2) is the cross section area of the flow cell, Δ*t* = *t1 − t0* is the time for the flow cell to be filled from *h*0 (L) and *h*1 (L). To calculate the head loss between the upstream tank and the flow cell the following expression is adopted:

(40)

Where *hc* is the hydraulic head measured in the upstream tank. Several tests have been carried out varying the control head, and in correspondence of each value of the average flow rate and head loss the average resistance to flow has been determined as:

(41)

**3.3 Solute and temperature tracer tests**

Solute and temperature tracer tests have been conducted through the following steps.

As initial condition, a specific value of hydraulic head difference between the upstream tank and downstream tank has been assigned. At *t* = 0 the valve *a* is closed so as the hydrostatic head inside the block assumes the same value to the one in the downstream tank. At *t* = 10 s the valve *a* is opened.

For solute tracer test at time *t* = 60 s by means of a syringe, a mass of 5×10-4 kg sodium chloride is injected into the inlet port. Due to the very short source release time, the instantaneous source assumption can be adopted which assumes the source of solute as an instantaneous injection (pulse). The multiparametric probe located within the flow cell measures the solute BTC.

As concerns thermal tracer tests at the time *t* = 60 s the valve *d* is opened while the valve c is closed. In such a way a step temperature function in correspondence of the inlet port *Tinj*(*t*) is imposed and measured by the first thermocouple. The other thermocouple located inside the outlet port is used to measure the thermal BTC.

The ultrasonic velocimeter is used in order to measure the instantaneous flow rate, whereas a multiparametric probe located at the outlet port measures the pressure and the electric conductivity.

**4 Results and discussion**

**4.1 Flow characteristics**

The Kirchhoff laws have been used in order to estimate the flow rates flowing in each single fracture. In Figure 3 a sketch of the 2D pipe conceptualization of the fracture network is reported.

The resistance to flow of each *SF* can be evaluated as the square bracket in Equation (34). For simplicity the linear and non linear terms have been considered constant and equal for each *SF*.

The resistance to flow for the whole fracture network can be evaluated as the sum of the resistance to flow of each *SF* arranged in chain and the total resistance of the parallel branches equal to the reciprocal of the sum of the reciprocal of the resistance to flow of each parallel branch:

(42)

Where *Rj* with j = 1 – 9 represents the resistance to flow of each *SF*, is the injection flow rate, and are the flow rates flowing in the parallel branch 6 and 3 – 4 – 5 respectively.

The flow rate is determined in iterative manner using the following iterative equation derived by the Equation (35) at the node 3:

(43)

Whereas the flow rate *Q2* is determined merely as:

(44)

The linear and nonlinear terms representative of the whole fracture network have been estimated matching the average experimental resistance to flow resulting from Equation (41) with resistance to flow estimated from Equation (42).

The linear and nonlinear term are equal respectively to *a* = 7.345×104 sm-3 and *b*=11.65×109 s2m-6. Inertial forces dominate viscous ones when the Forchheimer number (*Fo*) is higher than one. *Fo* can be evaluated as the ratio between the non linear loss and the linear loss . The critical flow rate *Qcrit* which represents the value of flow rate for which *Fo* = 1 is derived as the ratio between *a* and *b* resulting *Qcrit* = 6.30×10-6 m3s-1.

Because of the nonlinearity of flow, varying the inlet flow rate *Q0* the ratio between the flow rates *Q1* and *Q2* flowing respectively in the branches 6 and 3 – 5 is not constant. When *Q0* increases *Q2* increases faster than *Q1*. The probability of water distribution of the branch 6 *PQ,6* is evaluated as the ratio between *Q0* and *Q1*, whereas the probability of water distribution of the branch 3 – 5 is equal to *PQ,3-5* = 1 − *PQ,6*.

**4.2 Fitting of breakthrough curves and interpretation of estimated model parameters**

The behavior of mass and heat transport has been compared varying the injection flow rates. In particular 21 tests in the range 1.83×10-6 - 1.26×10-5 m3s-1 (Re in the range 17.5 – 78.71) for heat transport have been made and compared with the 55 tests in the range 1.32×10-6 - 8.34×10-6 m3s-1 (Re in the range 8.2 – 52.1) for solute transport presented in previous studies.

The observed heat and mass BTCs for different flow rates have been individually fitted using the ENM approach presented in section 2.3. For simplicity the transport parameters *uf*, *Df* and *α* are assumed equal for all branches of the fracture network. The probability of mass and heat distribution are assumed equal to the probability of water distribution.

The experimental BTCs are fitted using Equation (36) and Equation (37) for mass and heat transport respectively. Note that for mass transport *cinj*(*t*) supposing the instantaneous injection condition becomes a Dirac delta function.

The determination coefficient (*r2*) and the root mean square error (*RMSE*) have been used in order to evaluate the goodness of fit.

Tables 1 and 2 show the values of transport parameters, the *RMSE* and *r2* for mass and heat transport respectively. Furthermore Figure 4 and Figure 5 show the fitting results of BTCs for some values of *Q0*.

The results presented in Tables 1 and 2 highlight that: the estimated convective velocities *uf* for heat transport are lower than for mass transport. Whereas the estimated dispersion *Df* for heat transport is higher than for mass transport. Regarding the transfer rate coefficient *α*, it assumes very low values for mass transport relatively to the convective velocity. Instead for heat transport the exchange rate coefficient is of the same order of magnitude of the convective velocity and, considering a characteristic length equal to *L* = 0.601 m corresponding to the length of the main path of the fracture network, the effect of dual – porosity is very strong and cannot be neglected relatively to the investigated injection flow range. Both mass and heat transport show a satisfactory fitting. In particular manner, *RMSE* varies in the range 0.0015 – 0.0180 for mass transport and in the range 0.0030 – 0.236 for heat transport, whereas *r2* varies in the range 0.9863 – 0.9987 for mass transport and in the range 0.0963 – 0.9998 for heat transport.

In order to investigate the different behavior between mass and heat transport, the relationships between injection flow rate and the transport parameters have been analyzed. In Figure 6 the relationship between *u*f and *Q0* is reported. Whereas in Figures 7 and 8 are reported the dispersion coefficient *Df* and the exchange term *α* as function of *uf* respectively. The figures show a very different behavior between mass and heat transport.

Regarding mass transport experiments according to previous studies (Cherubini at al., 2013a, 2013b, 2013c and 2014) the figure 5 shows that for values of *Q0* higher than 4×10-6 m3s-1 *uf*increases less rapidly. This behavior was due to the presence of inertial forces that gave rise to a retardation effect on solute transport.

Instead Figure 7 shows a linear relationship between *uf*and *Df* suggesting that inertial forces did not exert any effect on dispersion and that geometrical dispersion dominates the Aris – Taylor dispersion.

In the same way as for mass transport, for heat transfer a linear relationship is evident between dispersion and convective velocity. Even if heat convective velocity is lower than solute advective velocity, the longitudinal thermal dispersivity assumes higher values than the longitudinal solute dispersivity. Also for heat transport experiments a linear relationship between *uf* and *Df* has been found.

Figure 8 shows the exchange rate coefficient α as function of the convective velocity *uf* for both mass and heat transport.

Regarding the mass transport, the estimated exchange rate coefficient *α* is much lower than the convective velocity. These results suggest that in the case study fracture – matrix exchange is very slow and it may not influence mass transport. Non Fickian behavior observed in the experimental BTCs is therefore dominated mainly by the presence of inertial forces and the parallel branches.

A very different behavior is observed for heat transport. Heat convective velocity does not seem to be influenced by the presence of the inertial force whereas *uf*is influenced by fracture matrix exchange phenomena resulting in a significant retardation effect. Once the model parameters for each flow rate have been determined, the unit response function (*fURF*), corresponding to the *PDF* obtained from impulsive injection of both solute and temperature tracers, is obtained. The unit response function can be characterized using the time moments and tail character analysis.

The mean residence time *tm* assumes the following expression:

(45)

Whereas the nth normalized central moment of distribution of the *fURF* versus time can be written as:

(46)

The second moment *μ*2 can be used in order to evaluate the dispersion relative to *t*m, whereas the skewness is a measure of the degree of asymmetry and it is defined as follows:

(47)

The tailing character *tc* can be described as:

(48)

Where Δ*tfall* denotes the duration of the falling limb defined as the time interval from the peak to the tail cutoff which is the time when the falling limb first reaches a value that is 0.05 times the peak value. Δ*trise* is defined as the time interval from the first arrival to the peak. This quantity provides a measure of the asymmetry between the rising and falling limbs. A value of *tc* significantly higher than 1 indicates an elongated tail compared to the rising limb (Cherubini et al., 2010).

In Figure 9 is reported the residence time versus the injection flow rates. The figure highlights that *tm* for heat transport is about 3 times higher than for mass transport. In particular way *tm* varies in the range 40. 3 - 237.1 *s* for mass transport and in the range 147.8 – 506.9 *s* for heat transport. This result still highlights that heat transport is more delayed than mass transport.

In same way the skewness *S* (Figure 10) and tailing character *tc* (Figure 11) are reported as function of *Q0*.

A different behavior for heat and mass transport is observed for the skewness coefficient. For heat transfer the skewness shows a growth trend which seems to decrease after *Q0* = 3×10-6 m3s-1. Its mean value is equal to 2.714. For solute transport the S does not show a trend, and assumes a mean value equal to 2.018.

The tailing character does not exhibit a trend for both mass and heat transport. In either cases *t*c is significantly higher than 1, specifically 7.70 and 30.99 for mass and heat transport respectively.

In order to explain the transport dynamics, the trends of dimensionless numbers *Pe* and *Da* varying the injection flow rate have been investigated. The Figure 12 shows the *Pe* as function of *Q0* for both mass and heat experiments. As concerns mass experiments *Pe*increases as *Q0* increases, assuming a constant value for high values (*Pe* = 7.5) of *Q0*. For heat transport a different behavior is observed, *Pe* showing a constant trend and being always lower than one. Even if the injection flow rate is relatively high, thermal dispersion is the dominating mechanism in heat transfer.

Figure 12 reports *Da* as function of *Q0*. For mass transport *Da* assumes very low values, of the order of magnitude of 10-4.

The convective transport scale is very low respect to the exchange transport scale, thus the mass transport in each single fracture can be represented with the classical advection dispersion model.

As regards heat transport *Da*assumes values around the unit showing a downward trend as injection flow rate increases switching from higher to lower values than the unit. As injection flow rate increases the convective transport time scale reduces more rapidly than the exchange time scale.

These arguments can be explained because the relationships between *Q0* and *uf* show a change of slope when *Da* becomes lower than the unit. In other words when *Da* is higher than the unit the exchange between fracture and matrix dominates on the convective transport giving rise to a more enhanced delay on heat transport, conversely when *Da* is lower than one convective transport dominates on fracture- matrix interactions and the delay effect is reduced.

Furthermore this effect is evident also on the trend observed in the graph *S* – *Q0* (Figure 10). For values of *Da* lower than the unit a change of slope is evident, the skewness coefficient increases more slowly. Thus for *Da*>1 the early arrival and the tail effect of *BTC* increase more rapidly than for *Da*<1.

Note that even if *Da* presents a downward trend as *Q0* increases, when the latter exceeds *Qcrit* a weak growth trend for *Da* is detected, that however assumes values lower than the unit.

The Figure 14 shows the dimensionless group *Pe*×*Da* varying the injection flow rate. Regarding mass transport *Pe*×*Da* is of the order of magnitude of 10-3 confirming the fact that the fracture – matrix interaction can be neglected relatively to the investigated range of injection flow rates. For heat transport *Pe*×*Da* assumes values just below the unit, with a downward trend as *Q0* increases. *td* and *te* have the same order of magnitude.

In order to find the optimal conditions for heat transfer in the analyzed fractured medium the thermal power exchanged per unit temperature difference (ML2T-1K-1) for each injection flow rate in quasi steady state conditions can be estimated. The thermal power exchanged can be written as:

(49)

The outlet temperature *Tout* can be evaluated as function of the *fURF* using the following expression:

(50)

Substituting the Equation (50) in the Equation (49) the thermal power exchanged per unit temperature difference is:

(51)

Figure 15 shows the similarities between the relationship - *Q0* (Figure 15a) and *Da*– *Q0* (Figure 14b). Higher *Da* values correspond to higher values of . The thermal power exchanged increases as the Damköhler number increases as shown in Figure 15c. These results highlight that for the observed case study the optimal condition for thermal exchange in the fractured medium is obtained when the exchange time scale is lower than the convective transport scale or rather when the dynamics of fracture – matrix exchange are dominant on the convective ones.

Moreover in a similar way to *Da*, shows a weak growth trend when *Q0* exceeds *Qcrit*. This means that the nonlinear flow regime improves the fracture – matrix thermal exchange, however at high values of injection flow rates convective and dispersion time scales are less than the exchange time scale. Nevertheless these results have been observed in a small range of *Da* numbers close to the unit. In order to generalize these results a larger range of *Da* numbers should be investigated.

In order to estimate the effective thermal conductivity coefficient *ke*, the principle of conservation of heat energy can be applied to the whole fractured medium. Neglecting the heat stored in the fractures, the difference between the heat measured at the inlet and at the outlet must be equal to the heat diffused into the matrix:

(52)

where *Af* is the whole surface area of the whole active fracture network and the gradient of *Tm* can be evaluated according to Equation (19) using temperature instead of concentration as variable. Then the average effective thermal conductivity can be obtained as:

(53)

The average effective thermal conductivity has been estimated for each injection flow rate (Figure 16) and assumes a mean value equal to. The estimated is one order of magnitude lower than the thermal conductivity coefficient reported in the literature (Robertson, 1988). Fractured media have a lower capacity for diffusion as opposed to the Tang’s model which has unlimited capacity. There is a solid thermal resistance in the fluid to solid heat transfer processes which depends on the rock – fracture size ratio.

This result is coherent with previous analyses on heat transfer carried out on the same rock sample (Pastore et al., 2015). In this study Pastore et al. (2015) found that the ENM model failed to model the behavior of heat transport in correspondence of parallel branches where the hypothesis of Tang’s solution of single fracture embedded in a porous medium having unlimited capacity cannot be considered valid. In parallel branches the observed BTCs are characterized by less retardation of heat propagation as opposed to the simulated BTCs.

**5 Conclusions**

Aquifers offer a possibility of exploiting geothermal energy by withdrawing the heat from groundwater by means of a heat pump and subsequently supplying the water back into the aquifer through an injection well. In order to optimize the efficiency of the heat transfer system and minimize the environmental impacts, it is necessary to study the behavior of convective heat transport especially in fractured media, where flow and heat transport processes are not well known.

Laboratory experiments on the observation of mass and heat transport in a fractured rock sample have been carried out in order to analyse the contribution of thermal dispersion in heat propagation processes, the contribution of nonlinear flow dynamics on the enhancement of thermal matrix diffusion and finally the optimal heat recovery and heat dissipation strategies.

The parameters that control mass and heat transport have been estimated using the ENM model based on Tang’s solution.

Heat transport shows a very different behavior compared to mass transport. The estimated transport parameters show differences of several orders of magnitude. Convective thermal velocity is lower than solute velocity, whereas thermal dispersion is higher than solute dispersion, mass transfer rate assumes a very low value suggesting that fracture – matrix mass exchange can be neglected. Non - fickian behavior of observed solute BTCs is mainly due to the presence of the secondary path and nonlinear flow regime. Contrarily heat transfer rate is comparable with convective thermal velocity giving rise to a retardation effect on heat propagation in the fracture network.

The discrepancies detected in transport parameters are moreover observable through the time moment and tail character analysis which demonstrate that the dual porosity behavior is more evident in the thermal BTCs than in the solute BTCs.

The dimensionless analysis carried out on the transport parameters proves that as the injection flow rate increases thermal convection time scale decreases more rapidly than the thermal exchange time scale, explaining the reason why the relationship *Q0* – *uf* shows a change of slope for *Da* lower than the unit.

Thermal dispersion dominates heat transport dynamics, the Peclet number and the product between Peclet number and Damköhler number is almost always less than the unit.

The optimal conditions for thermal exchange in a fracture network have been investigated. The power exchanged increases in a potential way as Da increases in the observed range.

The Explicit Network Model is an efficient computation methodology to represent flow, mass and heat transport in fractured media, as 2D and/or 3D problems are reduced to resolve a network of 1D pipe elements. Unfortunately in field case studies it is difficult to obtain the full knowledge of the geometry and parameters such as the orientations and aperture distributions of the fractures needed by the ENM even by means of field investigation methods. However in real case studies the ENM can be coupled with continuum models in order to represent greater discontinuities respect to the scale of study that generally give rise to preferential pathways for flow, mass and heat transport.

A method to represent the topology of the fracture network is represented by multi fractal analisys analysis as discussed in Tijera at al. (2009) and Tarquis at al. 2014.

This study has permitted to detect the key parameters to design devices for heat recovery and heat dissipation that exploit the convective heat transport in fractured media.

Heat storage and transfer in fractured geological systems is affected by the spatial layout of the discontinuities.

Specifically, the rock – fracture size ratio which determines the matrix block size is a crucial element in determining matrix diffusion on fracture – matrix surface.

The estimation of the average effective thermal conductivity coefficient shows that it is not efficient to store thermal energy in rocks with high fracture density because the fractures are surrounded by a matrix with more limited capacity for diffusion giving rise to an increase in solid thermal resistance. In fact, if the fractures in the reservoir have a high density and are well connected, such that the matrix blocks are small, the optimal conditions for thermal exchange are not reached as the matrix blocks have a limited capability to store heat.

On the other hand, isolated permeable fractures will tend to lead to the more distribution of heat throughout the matrix.

Therefore, subsurface reservoir formations with large porous matrix blocks will be the optimal geological formations to be exploited for geothermal power development.

The study could help to improve the efficiency and optimization of industrial and environmental systems, and may provide a better understanding of geological processes involving transient heat transfer in the subsurface.

Future developments of the current study will be carrying out investigations and experiments aimed at further deepening the quantitative understanding of how fracture arrangement and matrix interactions affect the efficiency of storing and dissipation thermal energy in aquifers. This could be achieved by means of using different formations with different fracture density and matrix porosity.

**References**

Abate, J. and Ward, W.: A unified Framework for numerically inverting laplace transforms. INFORMS Journal of Computing, 18, 408-421, 2006.

Anderson, M. P.: Heat as a ground water tracer, Ground Water, 43(6), 951–968, doi:10.1111/j.1745-6584.2005.00052, 2005.

Auradou, H., Deazerm G., Boschan, A., Hulin J. and Koplik, J.: Flow channeling in a single fracture induced by shear displacement. Geothermics, 35, 575-588, 2006.

Bear, J.: Dynamics of Fluids in Porous Media. Environmental Science Series, Elsevier, Amsterdam, 764, SD-008, 1972.

Becker, M.W. and Shapiro, A. M.: Interpreting tracer breakthrough tailing from different forced gradient tracer experiment configurations in fractured bedrock. Water Resources Research. 39(1):1024, 2003.

Bodin, J., Porel, G., Delay, F., Ubertosi, F., Bernard, S. and de Dreuzy, J.R.: Simulation and analysis of solute transport in 2D fracture/pipe networks. The SOLFRAC program. Journal of Contaminant Hydrology 89 (1-2), 1-28, 2007.

Bravo, H. R., Jiang, F. and Hunt R. J.: Using groundwater temperature data to constrain parameter estimation in a groundwater flow model of a wetland system, Water Resour. Res., 38(8), 1153, doi:10.1029/ 2000WR000172, 2002.

Bredehoeft, J. and Papadopulos, I., S.: Rates of vertical groundwater movement estimated from the Earth’s thermal profile. Water Resour Res 1(2):325–328, 1965.

Cherubini, C.: A modeling approach for the study of contamination in a fractured aquifer, Geotechnical and Geological Engineering 26 (5), 519-533, DOI 10.1007/s10706-008-9186-3, 2008.

Cherubini, C., Pastore, N. and Francani, V.: Different approaches for the characterization of a fractured karst aquifer, WSEAS Transactions On Fluid Mechanics 1, 29-35, 2008.

Cherubini, C., Giasi, C. I., and Pastore, N.: Application of Modelling for Optimal Localisation of Environmental Monitoring Sensors, Proceedings of the Advances in sensor and Interfaces (IWASI), Trani, Italy, 222–227, 2009.

Cherubini, C. and Pastore, N.: Modeling contaminant propagation in a fractured and karstic aquifer. Fresenius Environmental Bulletin. 19 (9), 1788-1794, 2010.

Cherubini, C., Hsieh, P. A., Tiedeman, C. R.: Modeling the effect of heterogeneity on forced-gradient flow tracer tests in heterogeneous aquifers. I Congreso Internacional de Hidrologia de Lianuras Azul, Buenos Aires, Argentina, 21- 24 September , 809-816, 2010.

Cherubini, C. and Pastore, N.: Critical stress scenarios for a coastal aquifer in southeastern Italy. Natural Hazards and Earth System Science. 11 (5) p. 1381-1393, 2011.

Cherubini, C., Giasi, C.I. and Pastore, N.: Bench scale laboratory tests to analyze non-linear flow in fractured media. Hydrology and Earth System Sciences. 16, 2511-2622, 2012.

Cherubini, C., Giasi, C.I. and Pastore, N.: Evidence of non-Darcy flow and non-Fickian transport in fractured media at laboratory scale. Hydrology and Earth System Sciences 17, 2599-2611, 2013a.

Cherubini, C., Giasi, C.I. and Pastore, N.: Laboratory tests to analyze solute transport behavior in fractured media. Rendiconti Online Società Geologica Italiana. 24, 55-57, 2013b.

Cherubini, C., Giasi, C.I. and Pastore, N.: Un modello fisico di laboratorio per analizzare dinamiche di flusso e trasporto in un campione di roccia fratturata a scala di banco [A laboratory physical model to analyse flow and transport processes in fractured rock sample at bench scale level]. Italian Journal Engineering Geology and Environment. (1) 19-32, 2013c.

Cherubini, C., Giasi, C.I. and Pastore, N.: Fluid flow modeling of a coastal fractured karstic aquifer by means of a lumped parameter approach. Environmental Earth Sciences. 70 (5), 2055-2060, 2013d.

Cherubini, C., Giasi, C.I. and Pastore, N.: On the reliability of analytical models to predict solute transport in a fracture network. Hydrology and Earth System Sciences 18, 2359-2374, 2014.

Constantz, J., Cox, M.H. and Su. G.W.: Comparison of Heat and Bromide as Ground Water Tracers Near Streams. Ground Water 41 no. 5: 647–656, 2003.

Constantz, J., Stewart, A.E., Niswonger, R. and Sarma. L.:Analysis of temperature profiles for investigating stream losses beneath ephemeral channels. Water Resour. Res. 38 no. 12: 1316, doi:10.1029/2001WR001221, 2002.

de Marsily, G.: Quantitative Hydrogeology : Groundwater Hydrology for Engineers, Academic Press, Orlando, Florida, 1986.

Domenico, P.A. and Palciauskas, V.V.: Theoretical analysis of forced convective heat transfer in regional ground-water flow. Geol Soc Am Bull 84:3803–3814, 1973.

Fahien, R.W.: Fundamental of Transport Phenomena. McGraw-Hill, New York, 1983.

Ferguson, G., Beltrami, H. and Woodbury, A.,D.: Perturbation of ground surface temperature reconstruction by groundwater flow. Geophys Res Lett 33:L13708. doi:10.1020/2006GL026,634, 2006.

Forchheimer, P.: Wasserbewegung durch Boden. Z. Ver. Dtsch. Ing. 45, 1781-1788, 1901.

Geiger, S. and Emmanuel, S.: Non-fourier thermal transport in fractured geological media. Water Resources Research, Vol 46,W07504, doi:10.1029/2009WR008671, 2010.

Gisladottir, V.R., Roubinet, D. and Tartakovsky, D.M.: Particle Methods for Heat Transfer in Fractured Media Transp Porous Med, 115:311–326 DOI 10.1007/s11242-016-0755-2, 2016.

Green, D., Perry, R. and Babcock R.: Longitudinal dispersion of thermal energy through porous media with a flowing fluid, Aiche J., 10(5), 645–651, 1964.

Hao, Y., Fu, P. and Carrigan, C. R.: Application of a dual-continuum model for simulation of fluid flow and heat transfer in fractured geothermal reservoir. Proceedings, Thirty-Eighth Workshop on Geothermal Reservoir Engineering Stanford University, Stanford, California February 11-13, 2013 SGP-TR-198, 2013.

Hatch, C. E., Fisher, A. T., Revenaugh, J. S., Constantz J., and Ruehl, C.: Quantifying surface water-groundwater interactions using time series analysis of streambed thermal records: Method development, Water Resour. Res., 42(10), W10410, doi:10.1029/2005WR004787, 2006.

Hawkins, A.J. and Becker, M. W.: Measurement of the Spatial Distribution of Heat Exchange in a Geothermal Analog Bedrock Site Using Fiber Optic Distributed Temperature Sensing. PROCEEDINGS, Thirty-Seventh Workshop on Geothermal Reservoir Engineering Stanford University, Stanford, California, January 30 - February 1, 2012 SGP-TR-194, 2012.

Hopmans, J. W., Simunek, J. and Bristow K. L.: Indirect estimation of soil thermal properties and water flux using heat pulse probe measurements: Geometry and dispersion effects, Water Resour. Res., 38(1), 1006, doi:10.1029/2000WR000071, 2002.

Ingebritsen, S. E., and Sanford W. E.: Groundwater in Geologic Processes, 341 pp., Cambridge Univ. Press, Cambridge, U.K, 1998.

Keery, J., Binley, A., Crook, N. and Smith. J.W.N.: Temporal and spatial variability of groundwater-surface water fluxes: Development and application of an analytical method using temperature time series. J. Hydrol. 336, 1-2: 1–16, 2007.

Klepikova, MV, Le Borgne T, Bour, O., Dentz M. and Hochreutener R.: [Heat as a tracer for understanding transport processes in fractured media: Theory and field assessment from multiscale thermal push‐pull tracer tests](https://scholar.google.be/citations?view_op=view_citation&hl=fr&user=jNtMDEAAAAAJ&citation_for_view=jNtMDEAAAAAJ:ZeXyd9-uunAC) Water Resources Research 52 (7), 5442-5457, 2016.

Kocabas, I.: Geothermal reservoir characterization via thermal injection backflow and interwell tracer testing. Geothermics, 34:27-46, 2005.

Lu, W. and Xiang, Y.: Experiments and sensitivity analyses for heat transfer in a meter-scale regularity fracture granite model with water flow. Journal of Zhejiang University-SCIENCE A (Applied Physics & Engineering). 13(12) 958-968, 2012.

Ma, R., Zheng C., Zachara, J. M. and Tonkin, M.: Utility of bromide and heat tracers for aquifer characterization affected by highly transient flow conditions, Water Resour. Res., 48, W08523, doi:10.1029/ 2011WR011281, 2012.

Martinez, A. R., Roubinet, D. and Tartakovsky, D. M.: Analytical models of heat conduction in fractured rocks. J. Geophys. Res. Solid Earth, 119, 2014.

Masciopinto, C., Volpe, A., Palmiotta, D. and Cherubini, C.: A combined PHREEQC-2/parallel fracture model for the simulation of laminar/non-laminar flow and contaminant transport with reactions, Journal of contaminant hydrology 117 (1), 94-108, 2010.

Molina-Giraldo, N., Bayer, P. and Blum, P.: Evaluating the influence of thermal dispersion on temperature plumes from geothermal systems using analytical solutions, Int. J. Therm. Sci., 50(7), 1223–1231, doi:10.1016/j.ijthermalsci.2011.02.004, 2011.

Molson, J.W., Frind, E.O and Palmer. C.D.: Thermal energy storage in an unconfined aquifer 2. Model development, validation and application. Water Resources Research 28, no. 10: 2857–2867, 1992.

Moonen, P., Sluys, L. J. and Carmeliet, J.: A continous – Discontinous Approach to simulate heat transfer in fractured media. Transp. Porous Med. 89 399-419, 2011.

Natarajan, N. and Kumar, G. S.: Thermal transport in a coupled sinusoidal fracture-matrix system. International Journal of Engineering Science and Technology 2(7) 2645-2650, 2010.

Neuville, A., Toussaint, R. and Schmittbuhl, J.: Fracture roughness and thermal exchange: a case study at Soultz-sous-Forêts. Comptes Rendus Geosci., 342(7–8):616–25, 2010.

Niswonger, R.G., and Prudic. D.E.: Modeling heat as a tracer to estimate streambed seepage and hydraulic conductivity. In Heat as a Tool for Studying the Movement of Ground Water Near Streams, ed. D.A. Stonestrom and J. Constantz, 81–89. USGS Circular 1260. Reston, Virginia: USGS, 2003.

Ouyang, X. L., Xu, R. N. and Jiang, P. X.: Effective solid-to-fluid heat transfer coefficient in egs reservoirs. Proceedings of the 5th International Conference on porous Media and its Applications in Science and Engineering ICPM5 June 22-27, 2014, Kona, Hawaii, 2014.

Papadopulos, S.S., and Larson. S.P.: Aquifer storage of heated water: Part II—Numerical simulation of field results. Ground Water 16, no. 4: 242–248, 1978.

Pastore, N., Cherubini, C., Giasi, C. I., Allegretti, N. M., Redondo, J. M. and Tarquis, A. M.: Experimental study of heat transport in fractured network Energy Procedia 76 ( 2015 ) 273 – 281, 2015.

Rau, G., C., Andersen, M.S. and Acworth, R., I.: Experimental investigation of the thermal dispersivity term and its significance in the heat transport equation for flow in sediments, Water Resources Research, 48, W03511, doi:10.1029/2011WR011038, 2012.

Read, T., Bour, O., Bense, V., Le Borgne, T., Goderniaux, P., Klepikova, M. V., Hochreutener, R., Lavenant, N. and Boshero, V.: Characterizing groundwater flow and heat transport in fractured rock using fiber-optic distributed temperature sensing. Geophysical research letters, 40 1-5, 2013.

Reiter, M.: Using precision temperature logs to estimate horizontal and vertical groundwater flow components. Water Resources Research 37, no. 3: 663–674, 2001.

Robertson, E.C.: Thermal Properties of Rocks. United States Department of the Interior Geological Survey Open-File Report 88-441. Reston, Virginia, 1988.

Ronan, A.D., Prudic, D.E., Thodal, C.E. and Constantz, J.: Field study and simulation of diurnal temperature effects on infiltration and variably saturated flow beneath an ephemeral stream. Water Resour. Res. 34 no. 9: 2137–2153, 1998.

Sauty, J.P., Gringarten, A.C., Fabris, H., Thiery, D., Menjoz, A. and Landel, P.A.: Sensible energy storage in aquifers 2. Field experiments and comparison with theoretical results. Water Resources Research 18, no. 2: 253–265, 1982.

Shook, G.M.: Predicting thermal breakthrough in heterogeneous media from tracer tests. Geothermics, 30(6), 573-580, 2001.

Smith, L. and Chapman. D.S.: On the thermal effects of groundwater flow. 1. Regional scale systems. Journal of Geophysical Research 88, no. B3: 593–608, 1983.

Su, G.W., Jasperse, J., Seymour, D. and Constantz, J.: Estimation of hydraulic conductivity in an alluvial system using temperatures. Ground Water 42 no. 6: 890–901, 2004.

Tang, D.H., Frind, E.O. and Sudicky, E.A.: Contaminant transport in fractured porous media: analytical solutions for a single fractures. Water Resources Research, Vol. 17, No 3, pp. 555-564, 1981.

Taniguchi, M., Williamson D.R. and Peck, A.J.: Disturbances of temperature-depth profiles due to surface climate change and subsurface water flow: 2, an effect of step increase in surface temperature caused by forest clearing in southwest-western Australia. Water Resour Res 35(5):1519–1529, 1999.

Tarquis, A. M., Platonov. A., Matulka, A., Grau, J., Sekula, E., Diez, M., Redondo, J. M.: Application of multi fractal analysis to the study of SAR features and oil spills in the ocean surface  . Nonlin. process. Geophys  Vol 21, 2, 439-450, 2014.

Tijera, M., Cano, J., Cano, D., Bolster D., Redondo, J.M: Filtered Deterministic waves and analysis of the Fractal dimension of the components of the wind velocity.  Il Nuovo Cimento C,  31, Vol 5-6. 653-667, 2009.

Tsang, C. F. and Neretnieks, I.: Flow channeling in heterogeneous fractured rocks. Reviews og Geophysics, 36 257-298, 1998.

Vandenbohede, A., Louwyck, A. and Lebbe L.: Conservative solute versus Heat transport porous media during push-pull tests, Transp. Porous Media, 76(2), 265–287, doi:10.1007/s11242-008-9246-4, 2009.

Vandenbohede, A., and Lebbe L.: Parameter estimation based on vertical heat transport in the surficial zone, Hydrogeol. J., 18(4), 931– 943, doi:10.1007/s10040-009-0557-5, 2010.

Whitaker, S.: Flow in porous media. I: A theoretical derivation of Darcy’s law. Transport in porous media, 1:3-25, 1986.

Woodbury A.D. and Smith J.L.: On the thermal effects of three dimensional groundwater flow, J. geophys. Res., 90(B1), 759–767, 1985.

Wu, Y.S., Ye, M. and·Sudicky, E. A.: Fracture-Flow-Enhanced Matrix Diffusion in Solute Transport Through Fractured Porous Media, Transp Porous Med, 81:21–34 DOI 10.1007/s11242-009-9383-4, 2010.


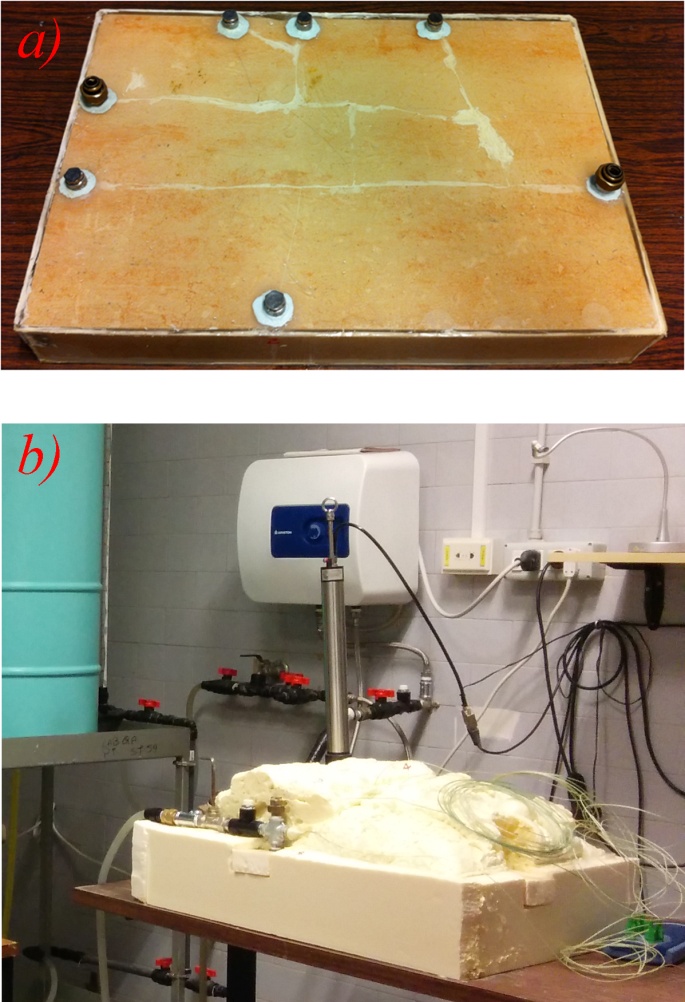


Figure 1. a) fractured block sealed with epoxy resin. b) thermal insulated fracture block connected to the hydraulic circuit.


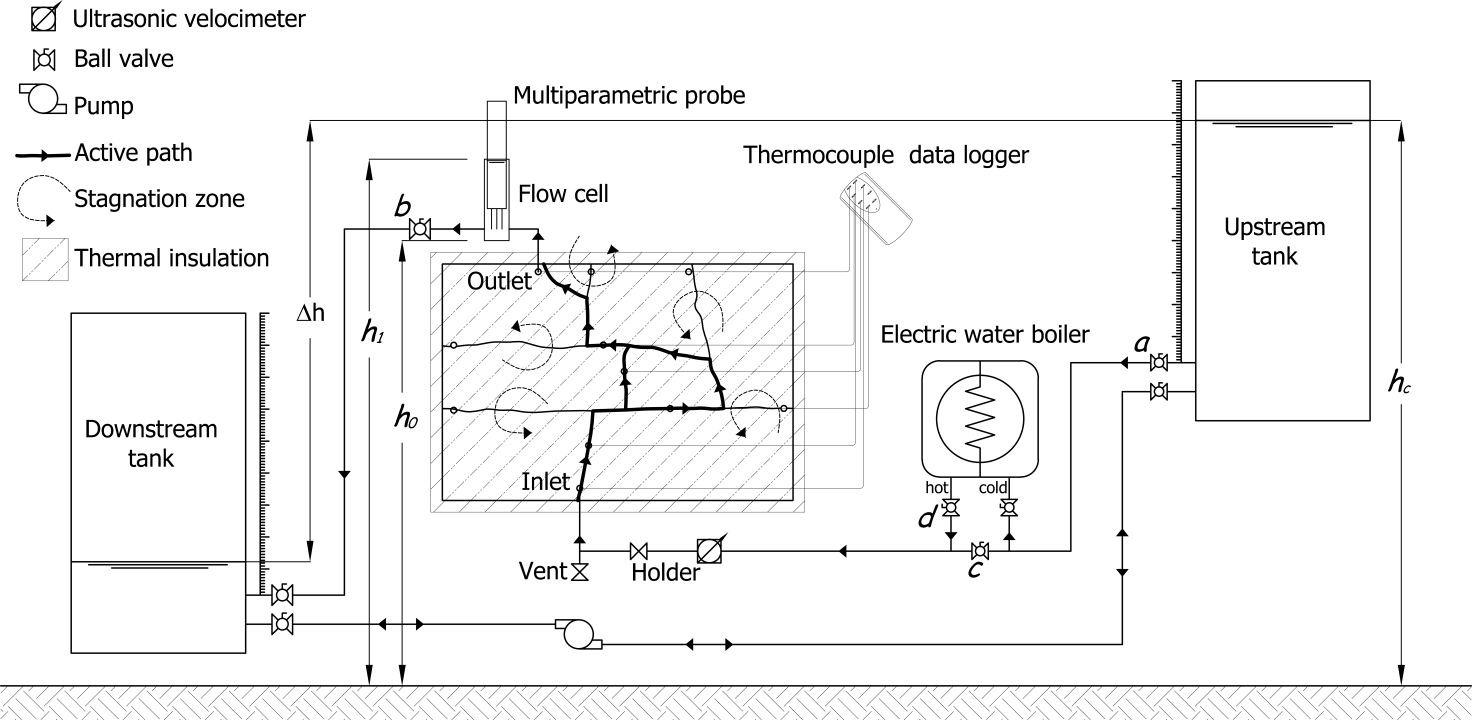


Figure 2. Schematic diagram of the experimental setup.


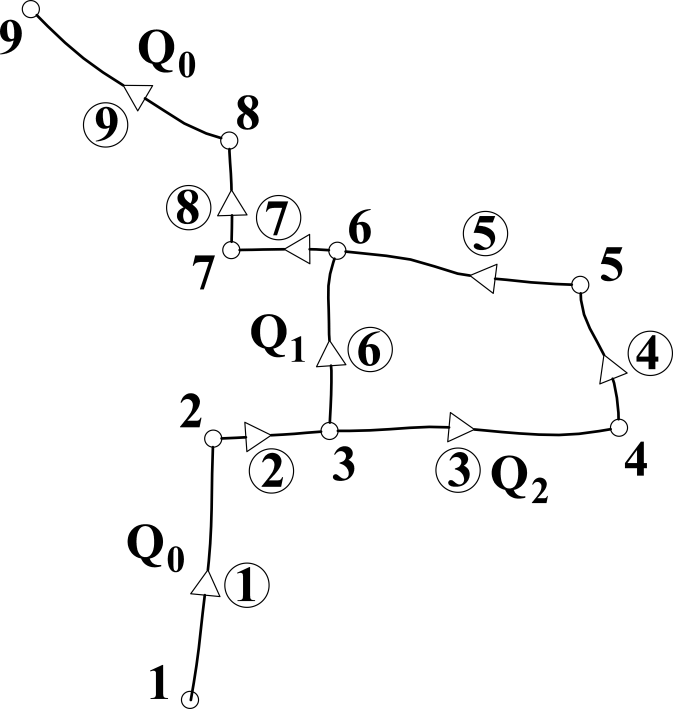


Figure 3. Two dimensional pipe network conceptualization of the fracture network of the fractured rock block in Figure1. Q0 is the injection flow rate, Q1 and Q2 are the flow rates that flowing in the parallel branch 6 and 3-4-5 respectively.

| Injection  flow rate  Q0 (m3s-1)×10-6 | Convective  velocity  uf (ms-1)×10-3 | | | Dispersion  Df (ms-2)×10-3 | | | Exchange rate  coefficient   (s-1)×10-6 | | | RMSE | r2 |
| --- | --- | --- | --- | --- | --- | --- | --- | --- | --- | --- | --- |
| 1.319 | 4.38 |  | 4.47 | 0.68 |  | 0.70 | 4.80 |  | 5.06 | 0.0053 | 0.9863 |
| 1.843 | 6.21 |  | 6.28 | 0.57 |  | 0.58 | 2.86 |  | 3.01 | 0.0026 | 0.9954 |
| 2.234 | 6.54 |  | 6.59 | 0.66 |  | 0.67 | 3.09 |  | 3.13 | 0.0017 | 0.9976 |
| 2.402 | 7.64 |  | 7.68 | 0.67 |  | 0.67 | 2.65 |  | 2.68 | 0.0015 | 0.9983 |
| 2.598 | 9.88 |  | 9.94 | 0.80 |  | 0.82 | 2.76 |  | 2.84 | 0.0015 | 0.9987 |
| 2.731 | 8.27 |  | 8.35 | 0.75 |  | 0.76 | 2.80 |  | 2.91 | 0.0018 | 0.9977 |
| 2.766 | 8.35 |  | 8.41 | 0.84 |  | 0.85 | 2.65 |  | 2.69 | 0.0021 | 0.9978 |
| 3.076 | 11.33 |  | 11.43 | 0.89 |  | 0.91 | 2.53 |  | 2.59 | 0.0029 | 0.9982 |
| 3.084 | 10.86 |  | 10.95 | 0.87 |  | 0.89 | 3.11 |  | 3.18 | 0.0022 | 0.9982 |
| 4.074 | 15.88 |  | 16.02 | 1.19 |  | 1.21 | 2.89 |  | 2.94 | 0.0048 | 0.9979 |
| 4.087 | 15.07 |  | 15.20 | 1.11 |  | 1.13 | 3.75 |  | 3.83 | 0.0045 | 0.9976 |
| 4.132 | 14.71 |  | 14.82 | 1.08 |  | 1.09 | 2.93 |  | 2.98 | 0.0028 | 0.9985 |
| 4.354 | 15.63 |  | 15.77 | 1.14 |  | 1.16 | 3.24 |  | 3.30 | 0.0052 | 0.9979 |
| 4.529 | 17.05 |  | 17.21 | 1.30 |  | 1.32 | 2.88 |  | 2.94 | 0.0055 | 0.9978 |
| 5.852 | 19.26 |  | 19.38 | 1.44 |  | 1.46 | 4.21 |  | 4.25 | 0.0042 | 0.9983 |
| 5.895 | 19.38 |  | 19.54 | 1.37 |  | 1.39 | 3.77 |  | 3.82 | 0.0058 | 0.9981 |
| 6.168 | 18.98 |  | 19.17 | 1.36 |  | 1.39 | 2.87 |  | 2.92 | 0.0091 | 0.9973 |
| 7.076 | 20.64 |  | 20.86 | 1.36 |  | 1.39 | 3.33 |  | 3.39 | 0.0123 | 0.9963 |
| 7.620 | 20.47 |  | 20.75 | 1.52 |  | 1.55 | 2.33 |  | 2.39 | 0.0180 | 0.9951 |
| 7.983 | 21.33 |  | 21.58 | 1.61 |  | 1.64 | 2.92 |  | 2.98 | 0.0137 | 0.9965 |
| 8.345 | 21.71 |  | 21.97 | 1.65 |  | 1.68 | 2.81 |  | 2.86 | 0.0136 | 0.9964 |
|  |  |  |  |  |  |  |  |  |  |  |  |

Table 1. Estimated values of parameters, RMSE, and determination coefficient r2 for ENM with Tang’s solution at different injection flow rates for mass transport.

| Injection  flow rate  Q0 (m3s-1)×10-6 | Convective  velocity  uf (ms-1)×10-3 | | | Dispersion  Df (ms-2)×10-3 | | | Exchange rate  coefficient   (s-1)×10-3 | | | RMSE | r2 |
| --- | --- | --- | --- | --- | --- | --- | --- | --- | --- | --- | --- |
| 1.835 | 2.20 |  | 2.91 | 1.91 |  | 1.95 | 6.27 |  | 6.59 | 0.0065 | 0.9997 |
| 2.325 | 1.74 |  | 2.73 | 1.82 |  | 1.91 | 5.39 |  | 9.26 | 0.0098 | 0.9992 |
| 2.462 | 0.35 |  | 0.52 | 2.42 |  | 2.57 | 2.25 |  | 2.33 | 0.0138 | 0.9984 |
| 2.605 | 0.44 |  | 0.54 | 2.33 |  | 2.40 | 0.74 |  | 0.77 | 0.0073 | 0.9995 |
| 2.680 | 2.18 |  | 2.95 | 1.77 |  | 1.83 | 5.68 |  | 8.31 | 0.0030 | 0.9998 |
| 2.800 | 0.36 |  | 0.79 | 2.53 |  | 2.68 | 3.54 |  | 3.72 | 0.0213 | 0.9982 |
| 2.847 | 1.73 |  | 3.16 | 1.98 |  | 2.06 | 4.95 |  | 13.45 | 0.0283 | 0.9978 |
| 3.003 | 2.34 |  | 2.87 | 2.24 |  | 2.32 | 5.33 |  | 6.55 | 0.0033 | 0.9998 |
| 3.998 | 2.56 |  | 2.75 | 6.63 |  | 6.80 | 2.05 |  | 2.11 | 0.0150 | 0.9993 |
| 4.030 | 2.60 |  | 2.83 | 7.18 |  | 7.36 | 1.42 |  | 1.52 | 0.0147 | 0.9993 |
| 4.217 | 3.85 |  | 4.56 | 8.92 |  | 9.29 | 4.86 |  | 5.77 | 0.0228 | 0.9945 |
| 4.225 | 2.43 |  | 2.64 | 7.53 |  | 7.84 | 1.64 |  | 1.80 | 0.0251 | 0.9987 |
| 4.471 | 2.30 |  | 3.13 | 9.18 |  | 9.50 | 1.06 |  | 1.33 | 0.1115 | 0.9957 |
| 5.837 | 3.51 |  | 4.13 | 4.95 |  | 5.36 | 0.61 |  | 0.79 | 0.2360 | 0.9872 |
| 5.880 | 2.71 |  | 3.10 | 4.23 |  | 4.60 | 0.04 |  | 0.05 | 0.1997 | 0.9926 |
| 6.445 | 4.71 |  | 5.12 | 6.18 |  | 6.81 | 1.49 |  | 1.54 | 0.2156 | 0.9863 |
| 7.056 | 8.15 |  | 8.46 | 10.05 |  | 10.74 | 5.63 |  | 6.00 | 0.0694 | 0.9951 |
| 7.959 | 9.64 |  | 10.11 | 18.40 |  | 19.47 | 10.92 |  | 11.55 | 0.0662 | 0.9971 |
| 8.971 | 13.40 |  | 13.79 | 24.57 |  | 25.82 | 15.35 |  | 15.85 | 0.0303 | 0.9985 |
| 12.364 | 11.01 |  | 11.67 | 21.97 |  | 22.63 | 5.23 |  | 5.25 | 0.0631 | 0.9939 |
| 12.595 | 13.71 |  | 14.26 | 26.65 |  | 27.61 | 9.26 |  | 9.41 | 0.0426 | 0.9955 |
|  |  |  |  |  |  |  |  |  |  |  |  |

Table 2. Estimated values of parameters, RMSE, and determination coefficient r2 for ENM with Tang’s solution at different injection flow rates for heat transport.


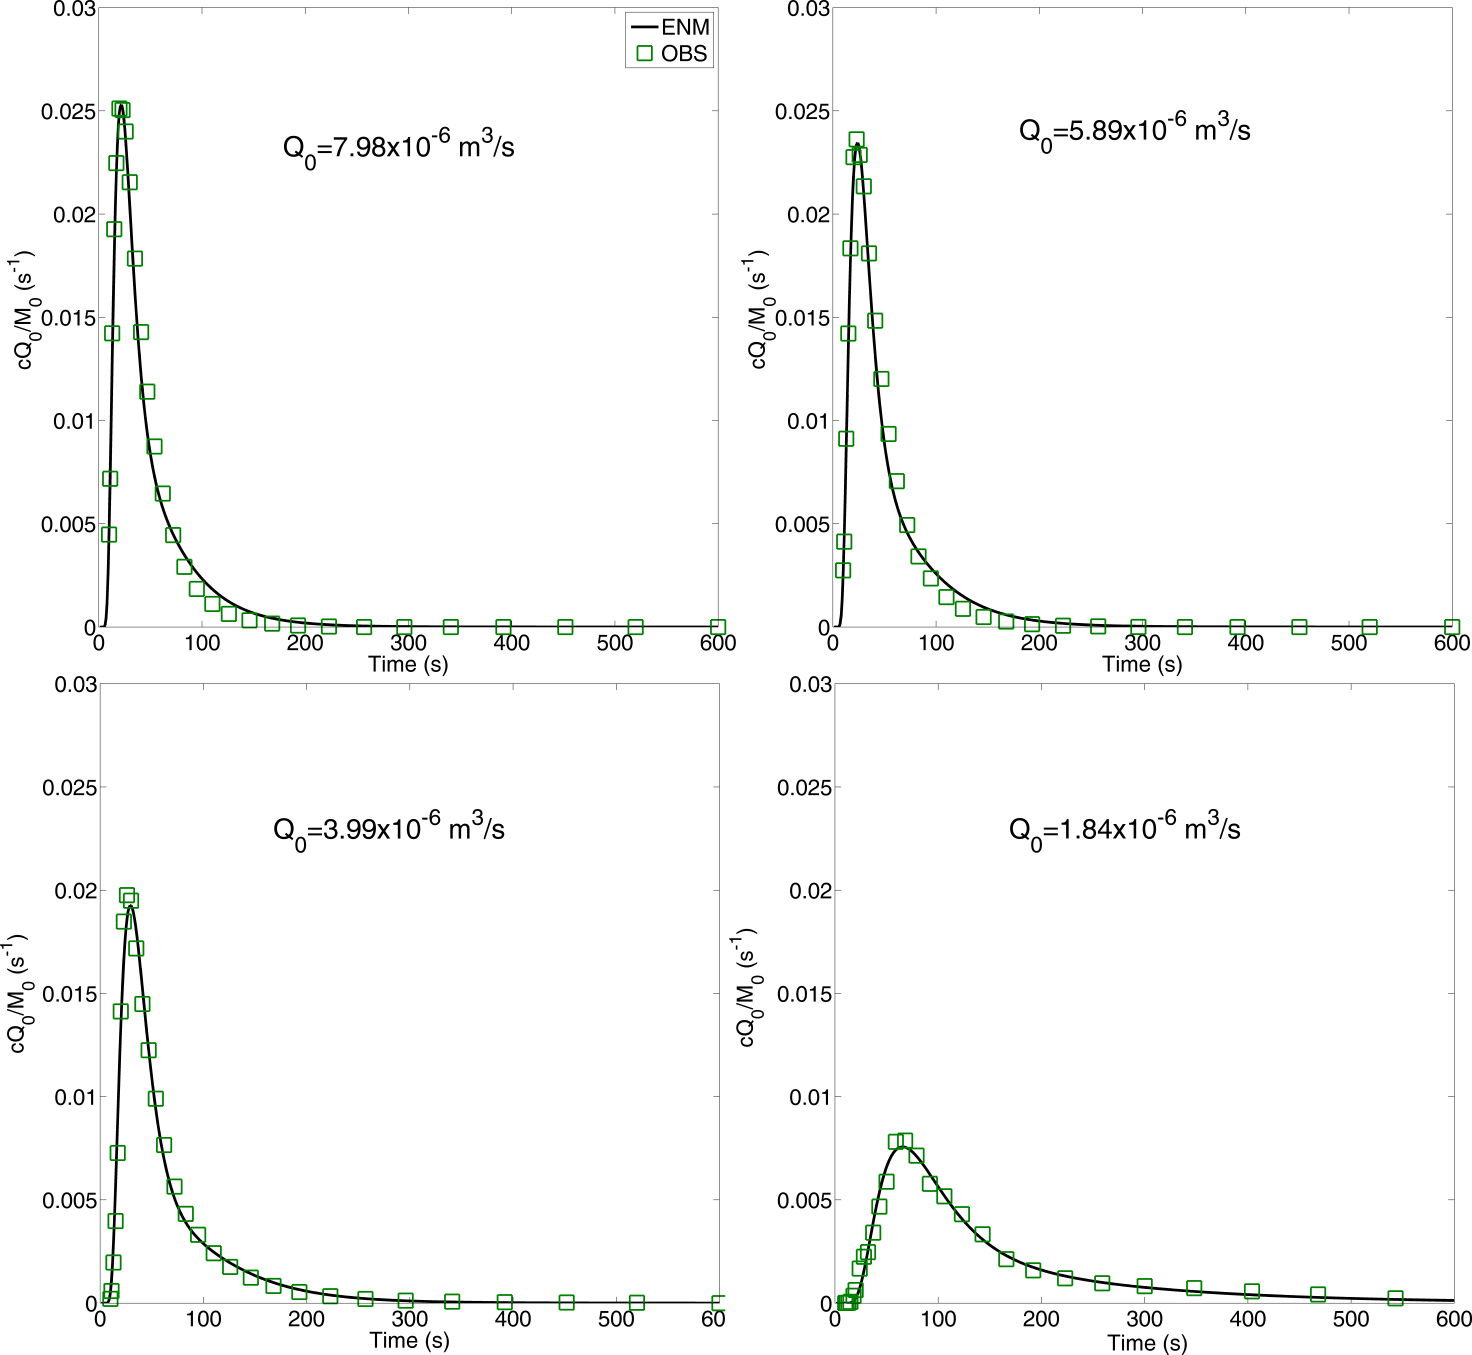


Figure 4. Fitting of BTCs at different injection flow rates using ENM with Tang’s solution for mass transport. Green square curve is the observed specific mass flux at the outlet port, continuous black line is the simulated specific mass flux.


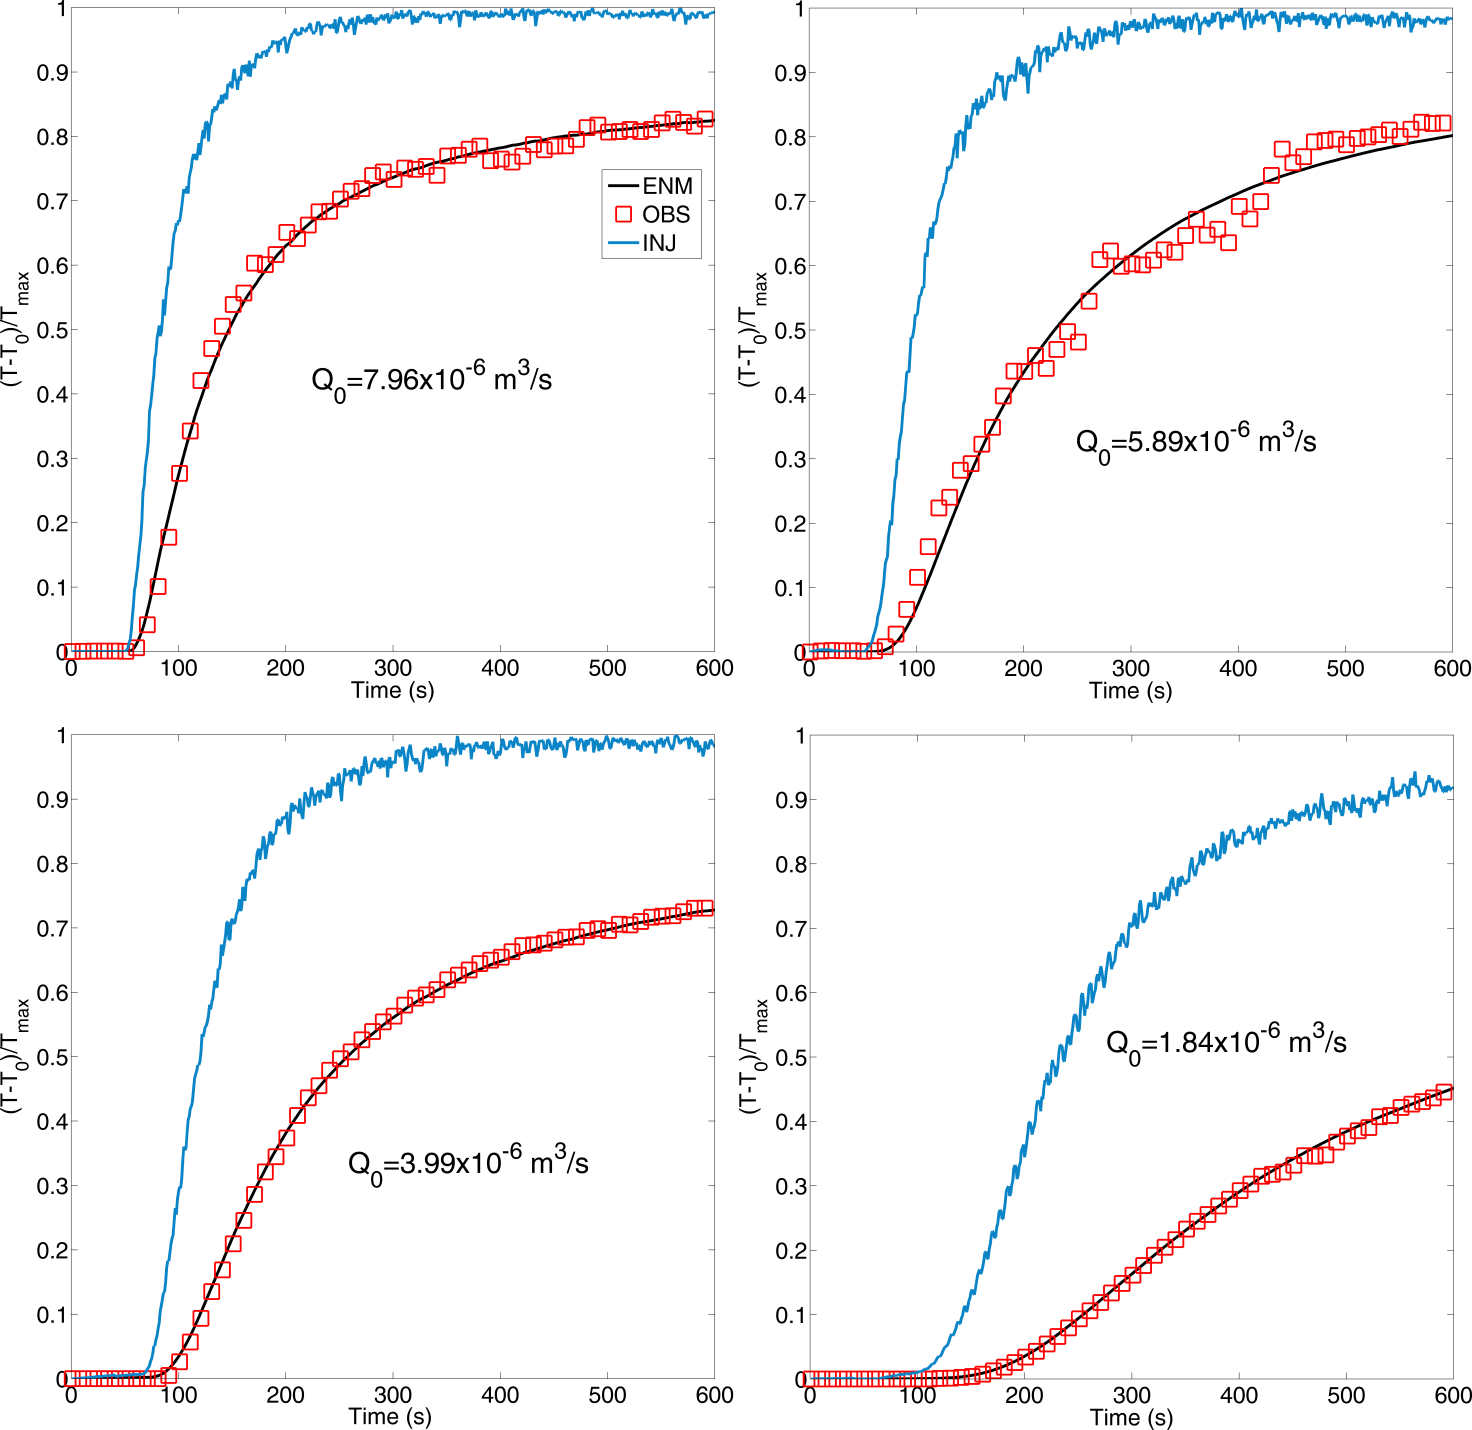


Figure 5. Fitting of BTCs at different injection flow rates using ENM with Tang’s solution for heat transport. The blue curve is the temperature observed at the inlet port used as the temperature injection function, the red square curve is the observed temperature at the outlet port, the black continuous curve is the simulated temperature at the outlet port.


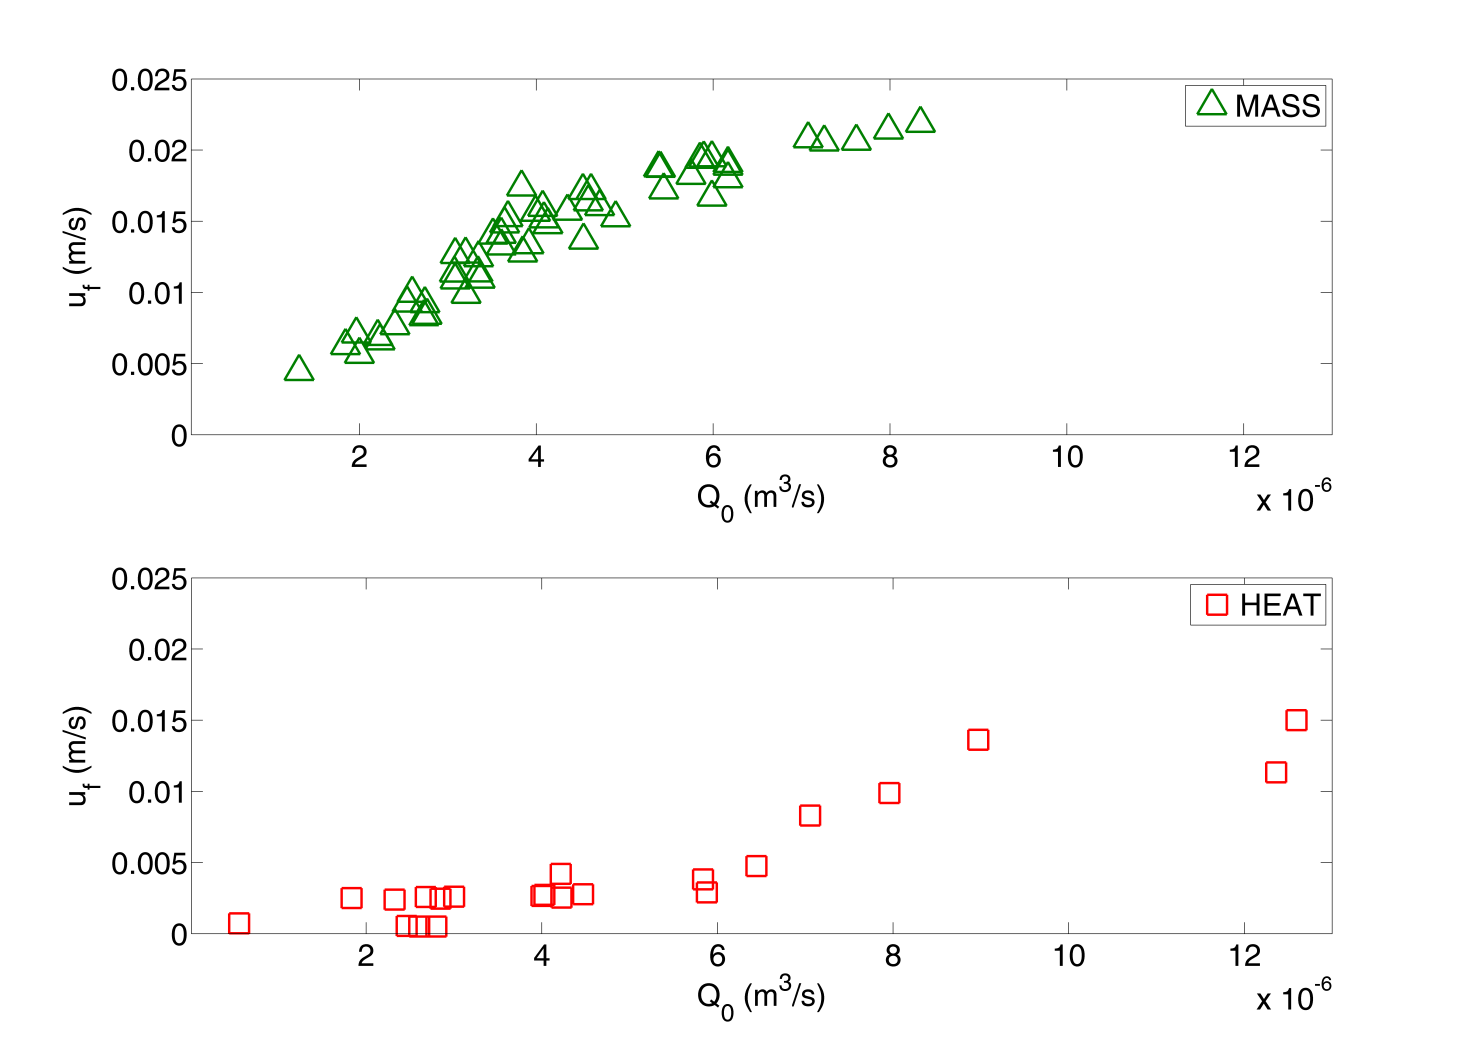


Figure 6. Velocity uf (m⋅s−1) as function of the injection flow rate Q0 (m3s −1) for ENM with Tang’s solution for both mass and heat transport.


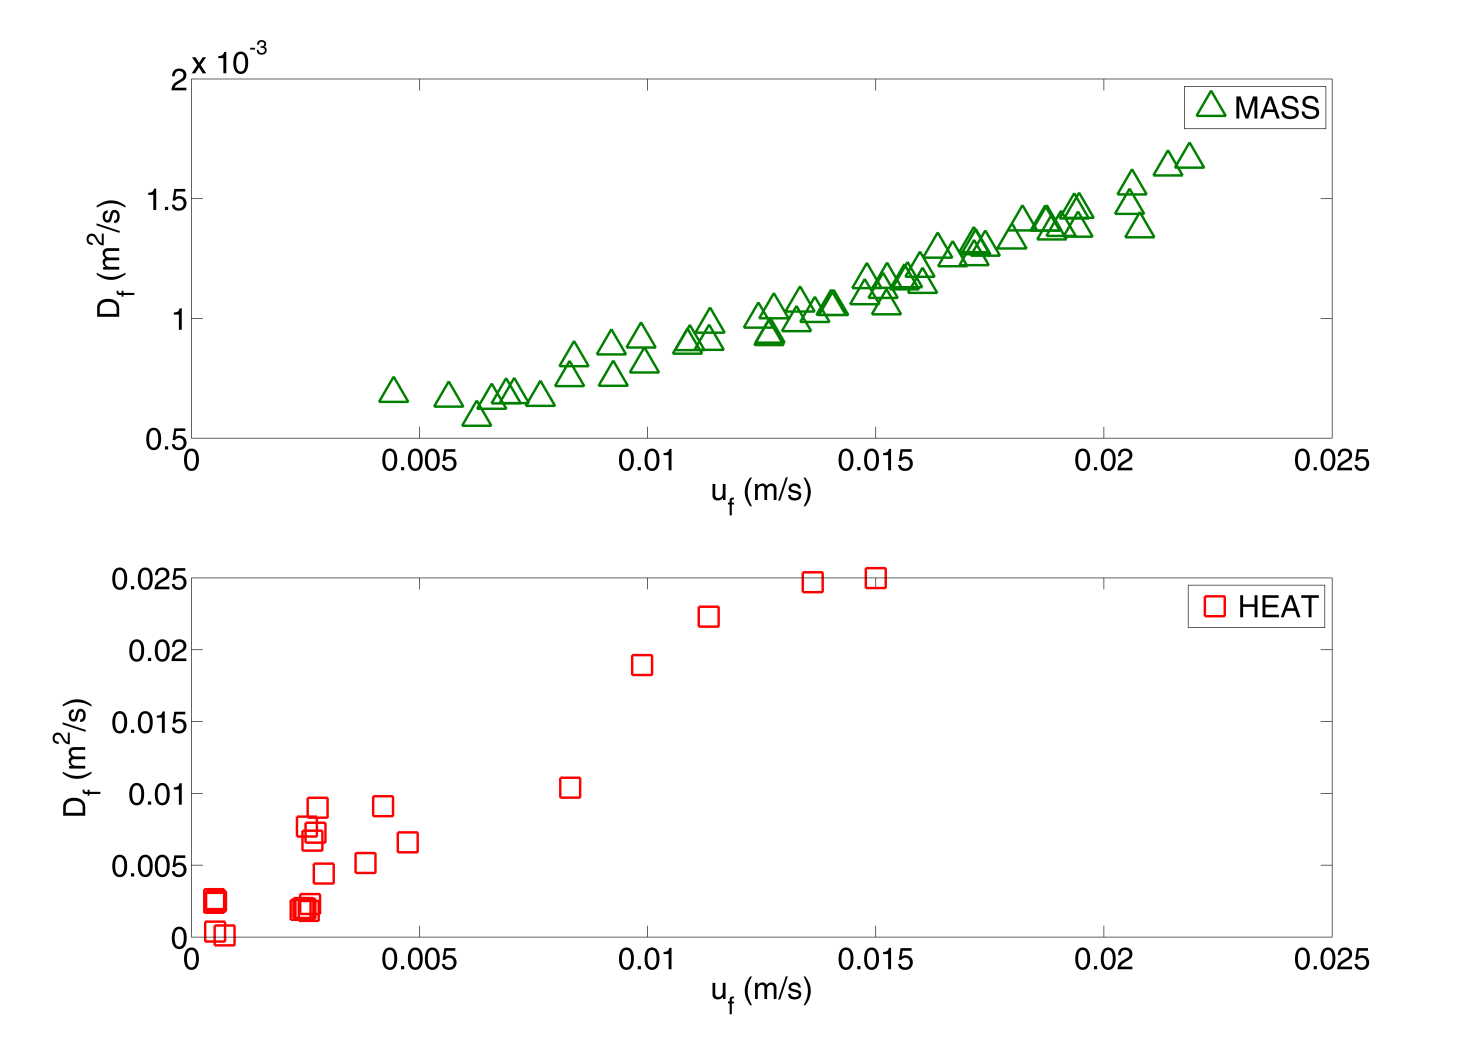


Figure 7. Dispersion Df (m⋅s−2) as function of velocity uf (m⋅s−1) for ENM with Tang’s solution for both mass and heat transport.


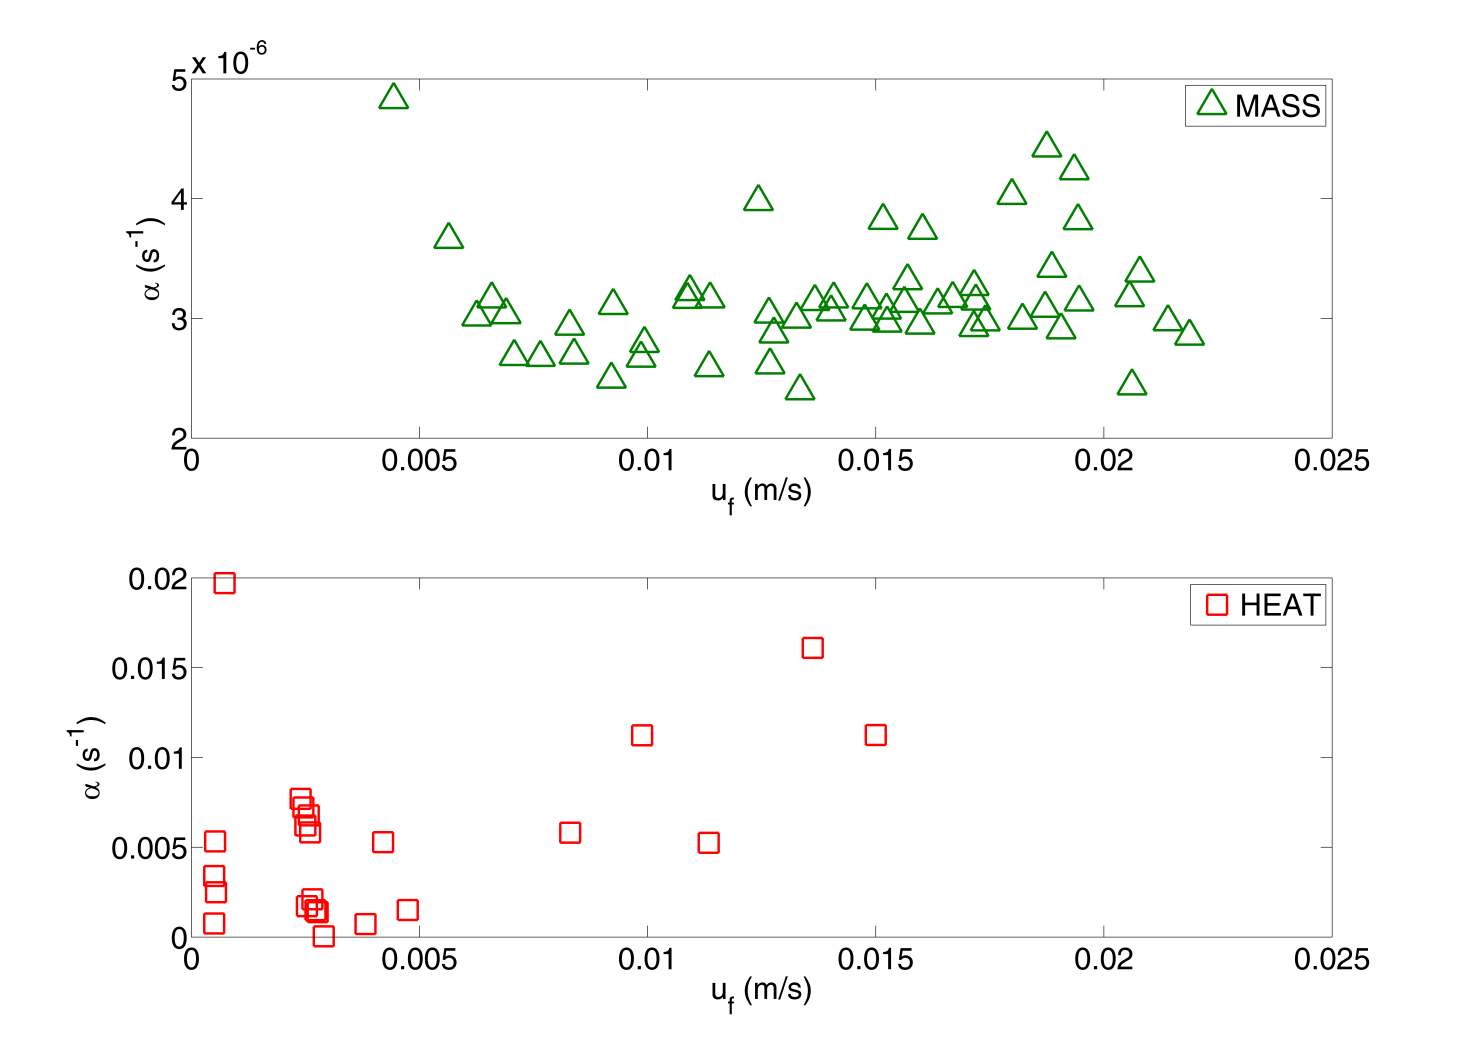


Figure 8. Transfer coefficient α (s-1) as function of velocity uf (m⋅s-1) for both mass and heat transport.

**
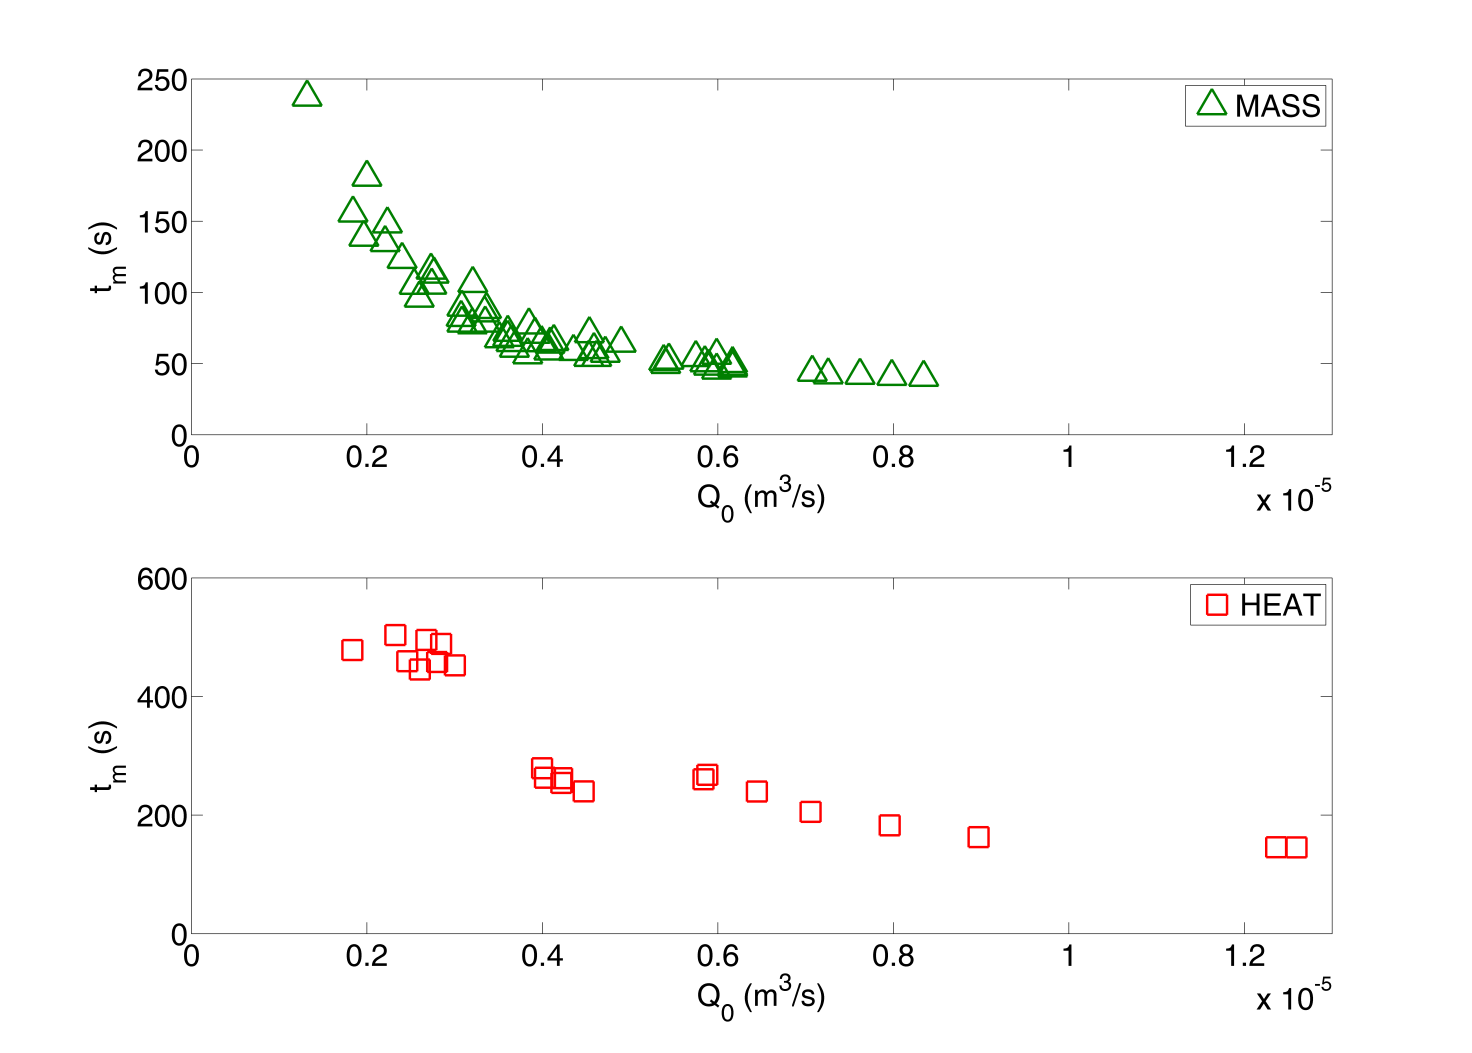
**

Figure 9. Mean travel time tm (s) as function of injection flow rate for both mass and heat transport.

**
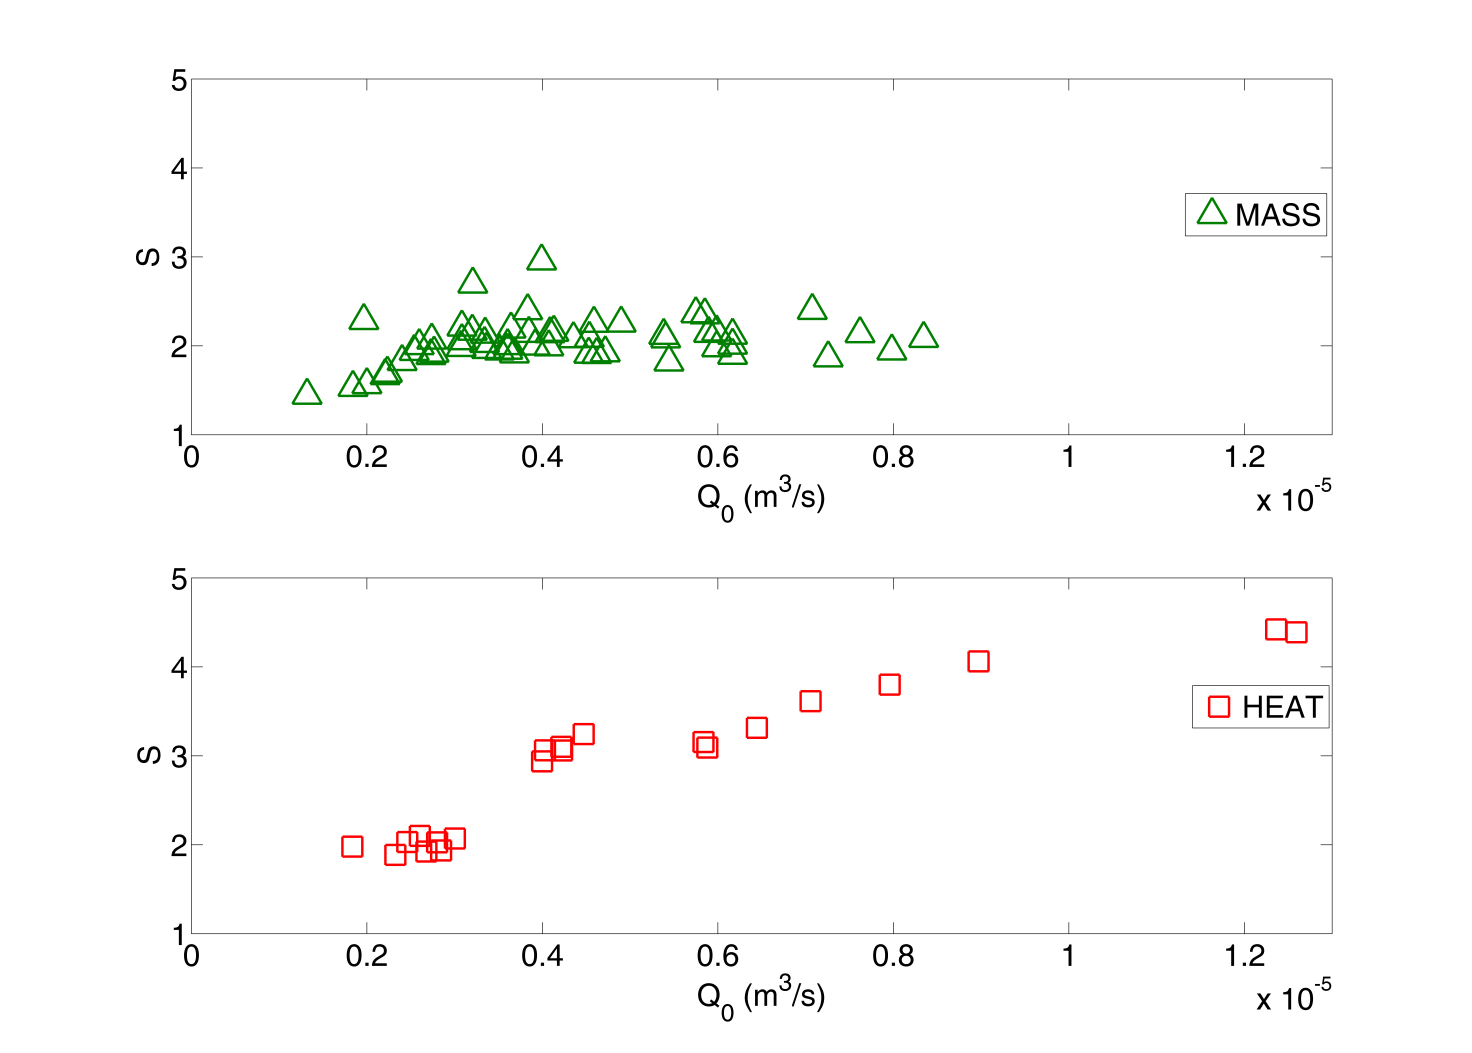
**

Figure 10. Skewness as function of injection flow rate for both mass and heat transport.

**
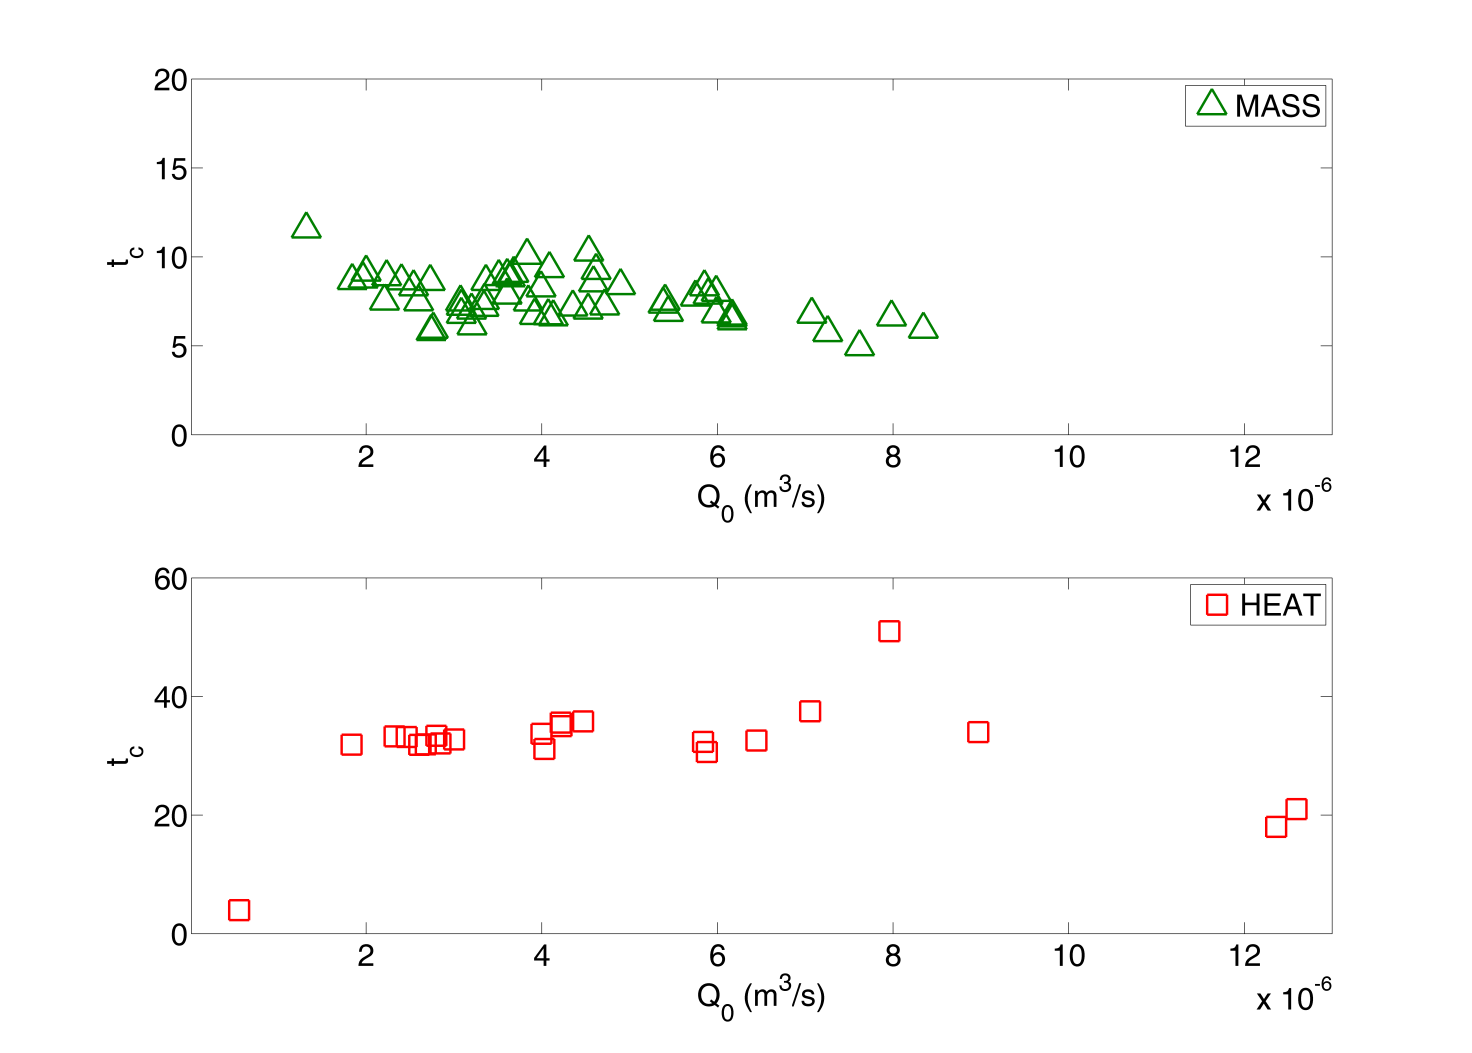
**

Figure 11. Tailing character tc as function of injection flow rate for both mass and heat transport.


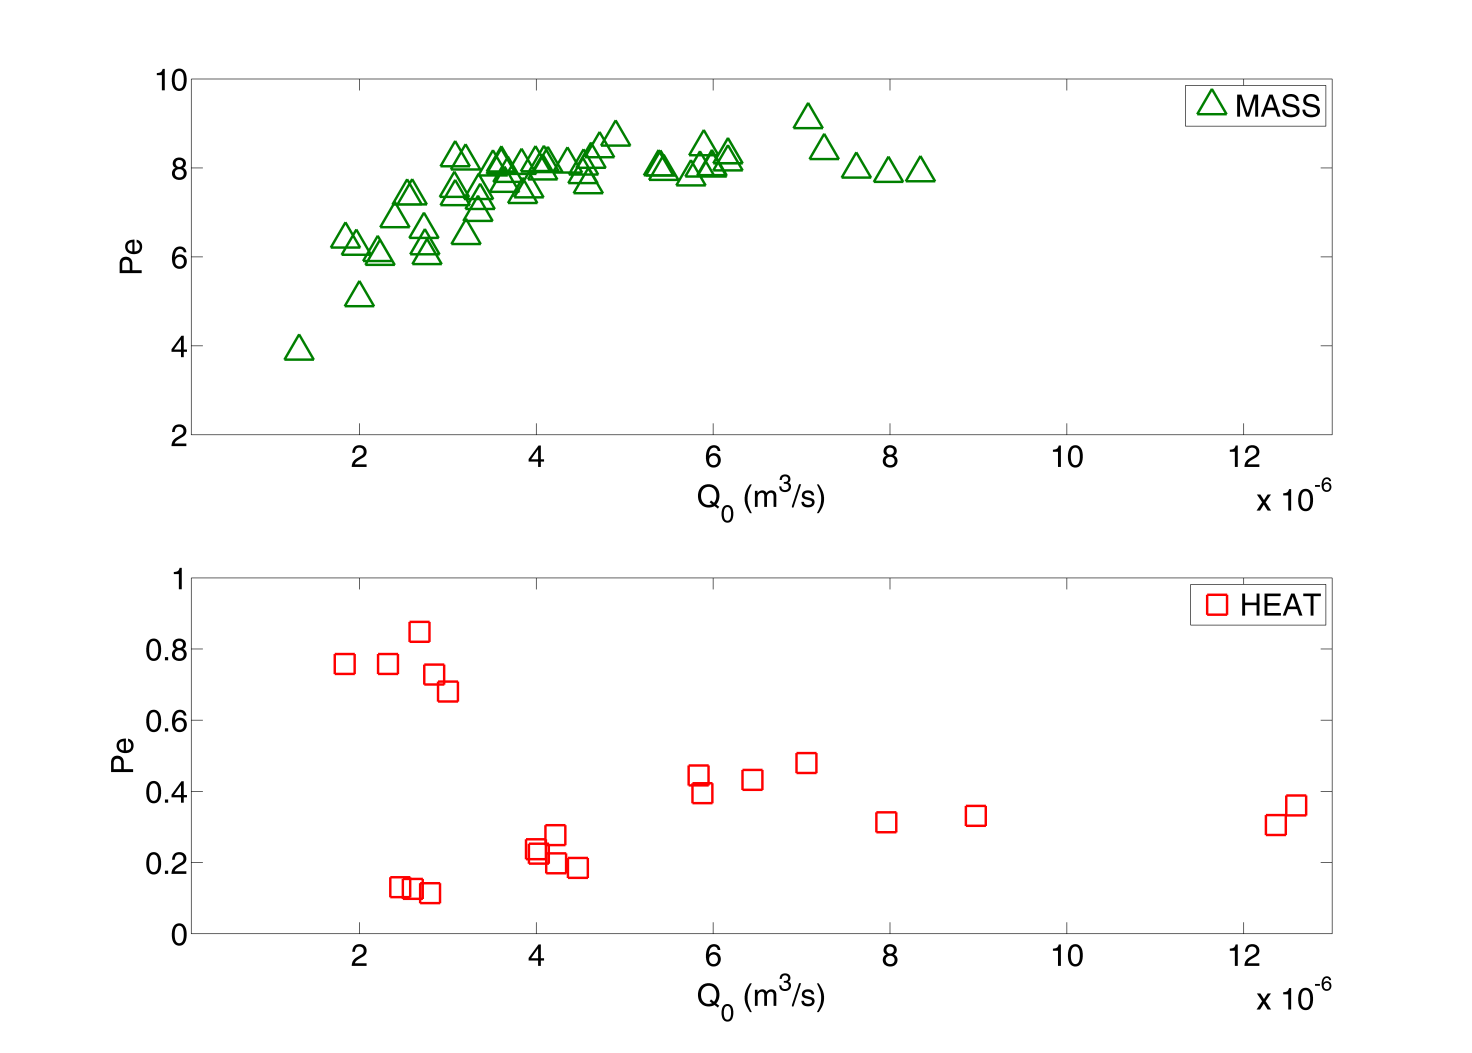


Figure 12. Peclet number as function of injection flow rate Q0 (m3s-1) for both mass and heat transport.

**
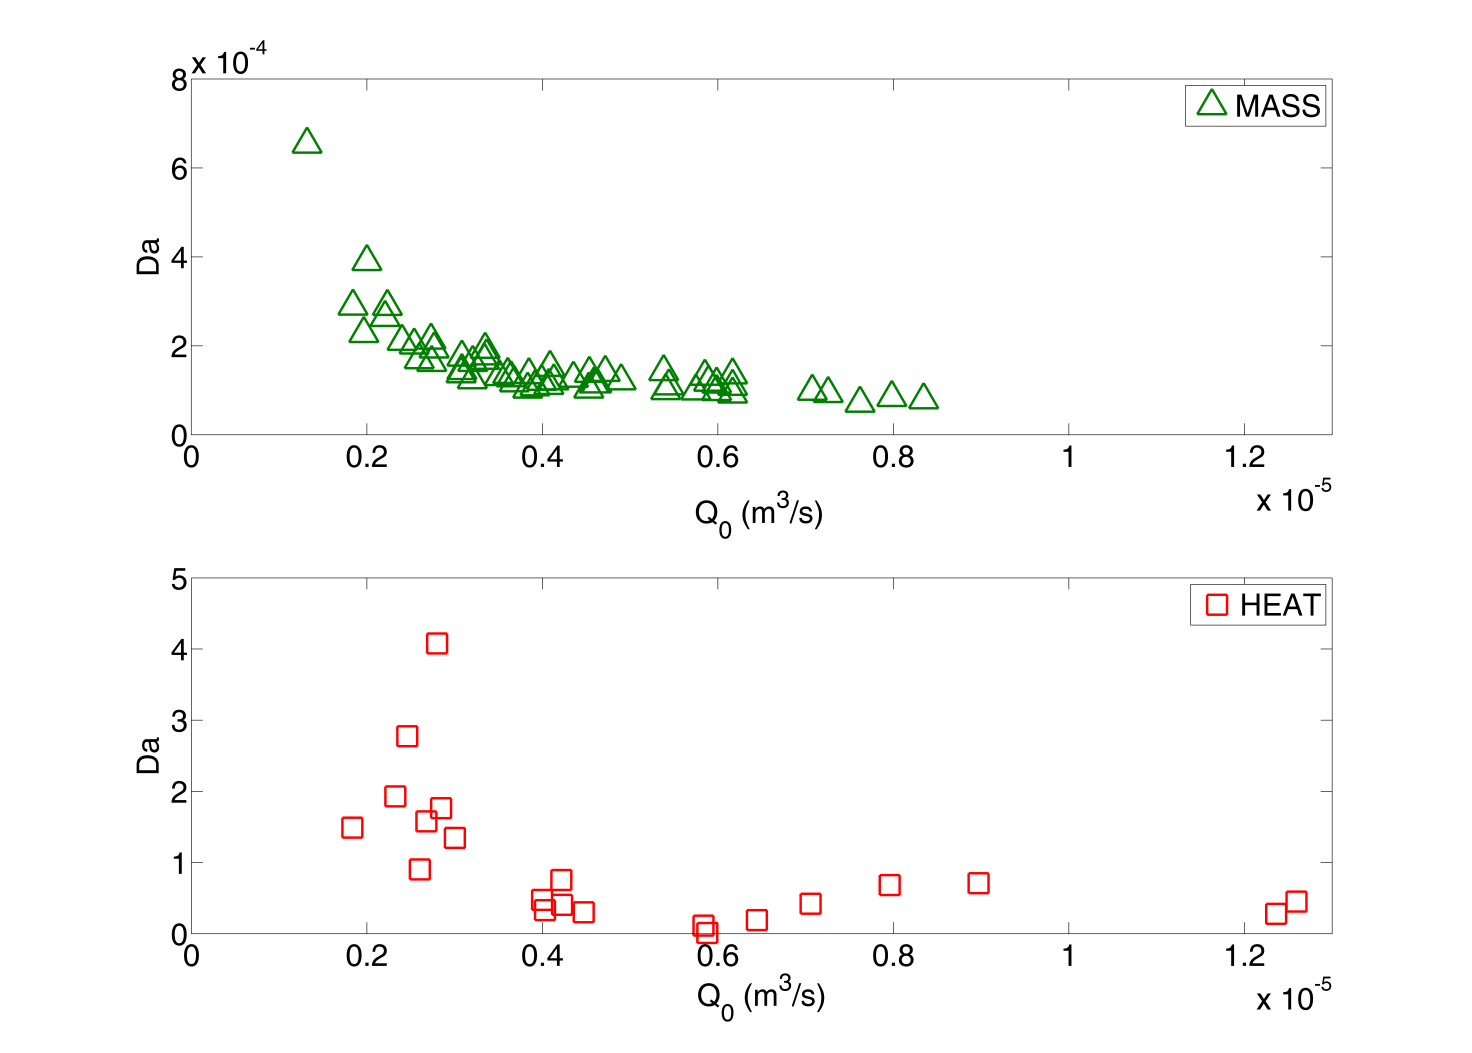
**

Figure 13. Da number as function of injection flow rate Q0 (m3s-1) for both mass and heat transport.


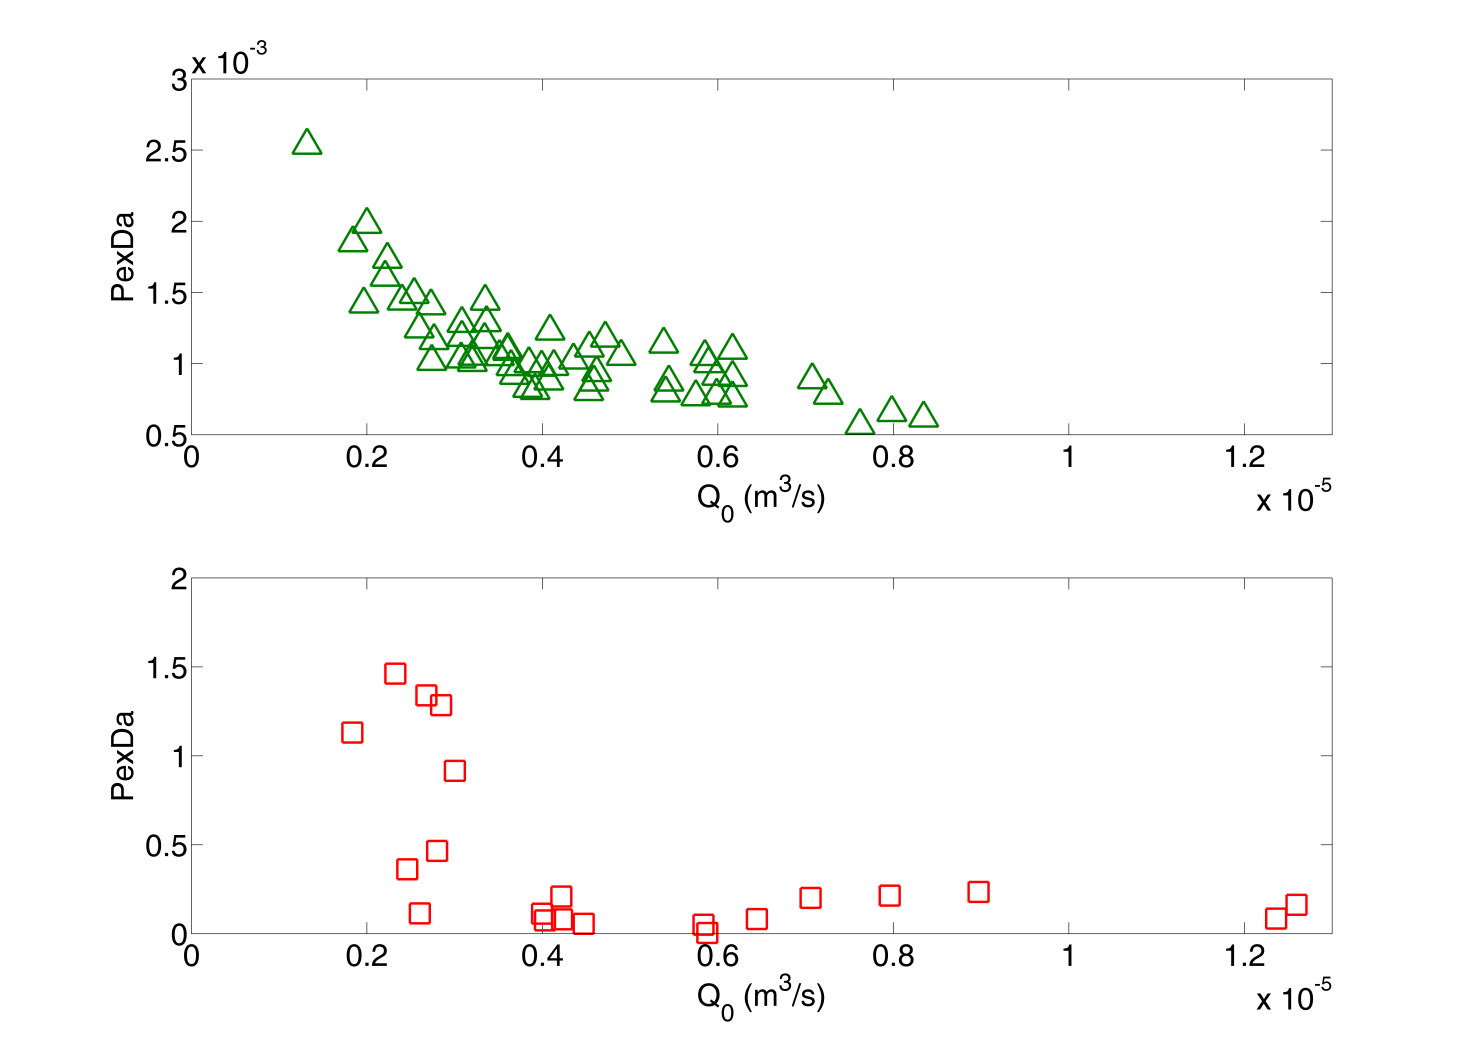


Figure 14. Pe×Da number as function of injection flow rate Q0 (m3s-1) for both mass and heat transport.


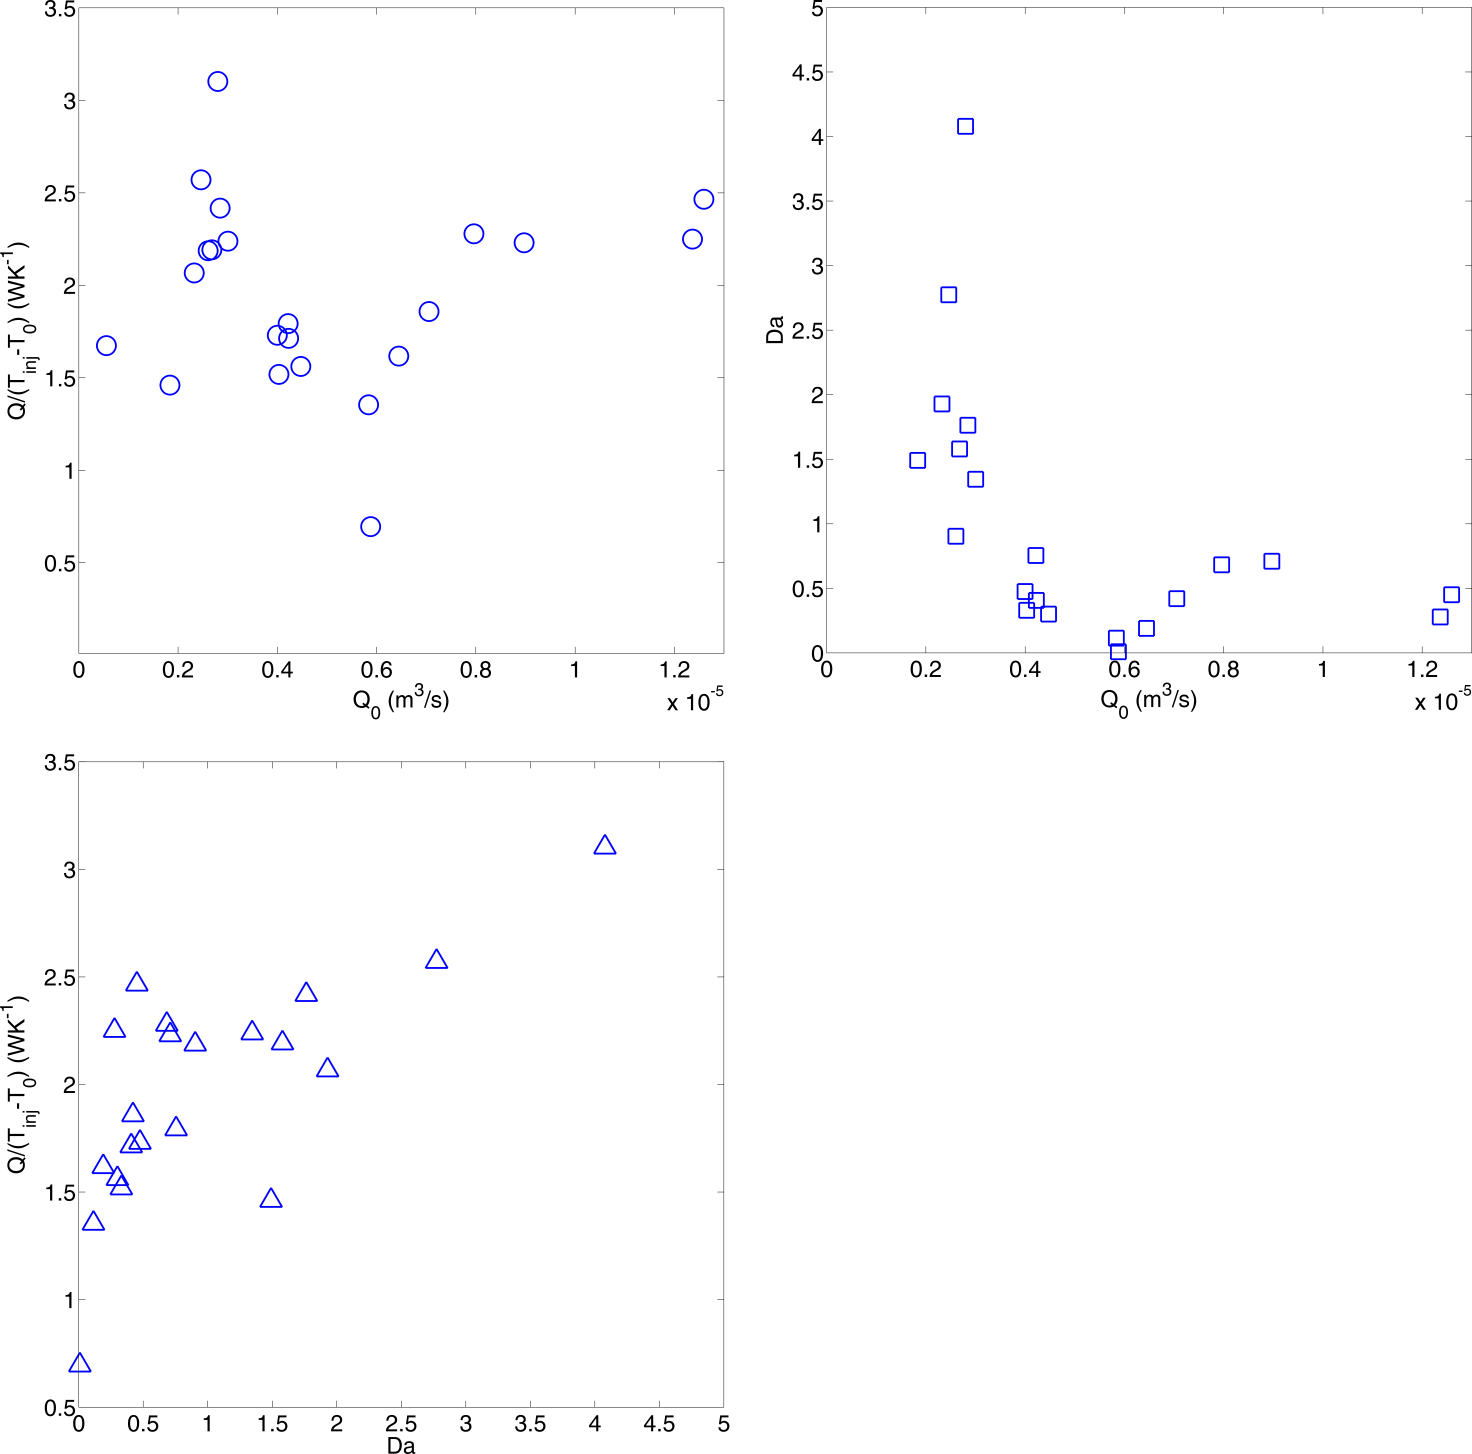


Figure 15. Heat power exchanged per difference temperature unit /(*Tinj-T0*) as function of injection flow rate Q0 (m3s-1) (a), Damköhler  number *Da* as function of injection flow rate (b), power exchanged per difference temperature unit as function of Damköhler  number (c).


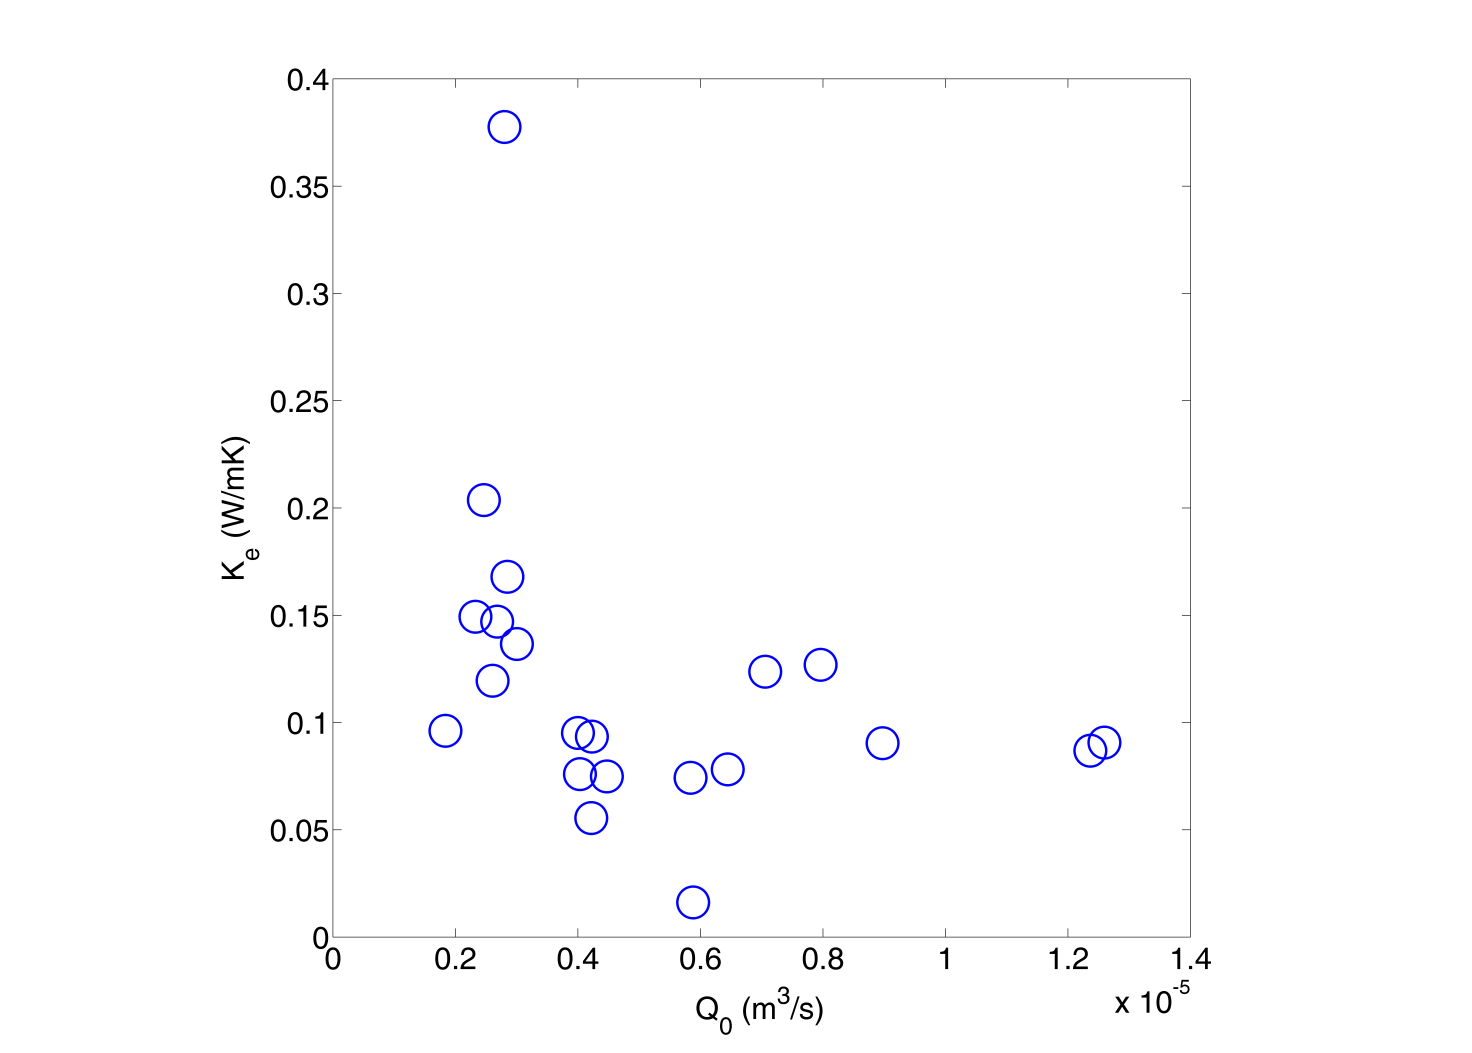


Figure 16. Effective thermal conductivity ke (Wm-1K-1) as function of injection flow rate Q0 (m3s-1).
