# Supplementary material for: Laboratory experimental investigation of heat transport in fractured media
Source: Copernicus journal article supplement (doi:10.5194/npg-24-23-2017), 2017-01-26
Supplement: Supplementary file 1 [file npg-24-23-2017-supplement.zip]

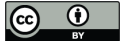

*Supplement of*

## **Laboratory experimental investigation of heat transport in fractured media**

**Claudia Cherubini et al.**

*Correspondence to:* Claudia Cherubini ([claudia.cherubini@brunel.ac.uk](mailto:claudia.cherubini@brunel.ac.uk)) and Nicola Pastore ([nicola.pastore@poliba.it](mailto:nicola.pastore@poliba.it))

- [npg-24-23-2017-supplement-title-page.pdf](#)
- [Manuscript\\_npg-2016-231216.docx](#)

The copyright of individual parts of the supplement might differ from the CC-BY 3.0 licence.
